1  
2  
3  
4  
5  
6  
7  
8  
9  
10  
11  
12  
13  
14  
15  
16  
17  
18  
19  
20

## Hybridization underlies localized trait evolution in cavefish

Moran, Rachel L.,<sup>1</sup> Jaggard, James B. <sup>2,3</sup>, Roback, Emma Y.<sup>1</sup>, Rohner, Nicolas<sup>4,5</sup>, Kowalko, Johanna E.<sup>6</sup>, Ornelas-García, C. Patricia<sup>7</sup> McGaugh, Suzanne E. <sup>1\*</sup>, Keene, Alex C. <sup>2\*</sup>

1. Department of Ecology, Evolution, and Behavior, University of Minnesota, Saint Paul, MN
2. Department of Biological Sciences, Florida Atlantic University, Jupiter FL
3. Department of Psychiatry and Behavioral Sciences, Stanford University, Stanford, CA
4. Stowers Institute for Medical Research, Kansas City, MO
5. Department of Molecular & Integrative Physiology, KU Medical Center, Kansas City, KS
6. Harriet L. Wilkes Honors College, Florida Atlantic University, Jupiter FL
7. Departamento de Zoología, Instituto de Biología, Universidad Autónoma de México, CP 04510, Mexico City, Mexico

## 21 **Summary**

22 Compared to selection on new mutations and standing genetic variation, the role of gene flow in  
23 generating adaptive genetic variation has been subject to much debate. Theory predicts that gene  
24 flow constrains adaptive evolution via natural selection by homogenizing allele frequencies among  
25 populations and introducing migrant alleles that may be locally maladaptive<sup>1</sup>. However, recent  
26 work has revealed that populations can diverge even when high levels of gene flow are present<sup>2-</sup>  
27 <sup>4</sup> and that gene flow may play an underappreciated role in facilitating local adaptation by  
28 increasing the amount of genetic variation present for selection to act upon<sup>5-8</sup>. Here, we  
29 investigate how genetic variation introduced by gene flow contributes to adaptive evolution of  
30 complex traits using an emerging eco-evolutionary model system, the Mexican tetra (*Astyanax*  
31 *mexicanus*). The ancestral surface form of the Mexican tetra has repeatedly invaded and adapted  
32 to cave environments. The Chica cave is unique in that it contains several pool microenvironments  
33 inhabited by putative hybrids between surface and cave populations<sup>9</sup>, providing an opportunity to  
34 investigate the dynamics of complex trait evolution and gene flow on a local scale. Here we  
35 conduct high-resolution genomic mapping and analysis of eye morphology and pigmentation in  
36 fish from multiple pools within Chica cave. We demonstrate that hybridization between cave and  
37 surface populations contributes to highly localized variation in behavioral and morphological traits.  
38 Analysis of sleep and locomotor behaviors between individual pools within this cave revealed  
39 reduced sleep associated with an increase in ancestry derived from cave populations, suggesting  
40 pool-specific ecological differences may drive the highly-localized evolution of sleep and  
41 locomotor behaviors. Lastly, our analyses uncovered a compelling example of convergent  
42 evolution in a core circadian clock gene in multiple independent cavefish lineages and burrowing  
43 mammals, indicating a shared genetic mechanism underlying circadian disruption in subterranean  
44 vertebrates. Together, our results provide insight into the evolutionary mechanisms that promote  
45 adaptive genetic variation and the genetic basis of complex behavioral phenotypes involved in  
46 local adaptation.

47 **Main Text**

48 A rapidly growing body of research demonstrates that gene flow, both among populations within  
49 species and between different species, is more common than previously thought and can play a  
50 key role in the evolutionary process by impeding or promoting adaptive divergence<sup>5,6,10-12</sup>. Hybrid  
51 zones resulting from interbreeding between lineages that occupy different environmental  
52 extremes offer a powerful means to detect targets of selection in the genome underlying complex,  
53 locally adapted traits. Natural variation present in recombinant hybrids can be leveraged through  
54 admixture mapping<sup>13,14</sup>, which identifies associations between genetic ancestry and trait variation  
55 in admixed populations formed by interbreeding between two or more diverged lineages. This  
56 association-based approach was first developed to uncover the genetic basis of diseases in  
57 humans following the observation that the frequencies of some disease-causing variants differ  
58 substantially among populations<sup>15,16</sup>. Recent advances in sequencing technology and statistical  
59 approaches have made it feasible to apply admixture mapping to identify adaptive loci underlying  
60 ecological divergence in plant and animal models of evolution<sup>17-24</sup>. However, previous studies in  
61 plants and animals have focused on hybrids formed between distinct species with substantial  
62 genetic divergence and reproductive isolation, making it difficult to identify regions associated with  
63 ecologically relevant traits versus intrinsic incompatibilities<sup>25</sup>. The application of admixture  
64 mapping to models of trait evolution has the potential to define fundamental interactions between  
65 genetic and environmental variation that shape evolution. Studies that apply whole genome  
66 sequencing to hybrids formed between interbreeding lineages in the earliest stages of divergence  
67 are likely to provide the most insight into the genetic basis of evolutionary change<sup>24,26</sup>, but are  
68 currently lacking.

69

70 The Mexican tetra, *Astyanax mexicanus*, is a powerful model system for investigating the genetic  
71 and evolutionary basis of trait development and behavior<sup>27-31</sup>. Surface populations inhabit rivers

72 from Texas to Mexico and have invaded caves multiple times, resulting in at least 30 populations  
73 of cave-morphs in the Sierra de El Abra region of Northeast Mexico<sup>9,32</sup>. At least two independent  
74 lineages of surface fish, commonly referred to in the literature as “old” and “new” lineages, have  
75 invaded caves within the past roughly 200,000 years<sup>33–37</sup>. Cavefish populations have converged  
76 on numerous morphological traits that are thought to be adaptive in the cave environment,  
77 including albinism and eye loss<sup>38</sup>. In addition, cavefish have repeatedly evolved multiple  
78 behavioral changes, including sleep loss, which may increase time allocated to foraging in  
79 nutrient-poor cave environments<sup>29,39</sup>. Recently, the application of molecular genetic approaches  
80 has led to the identification of genetic factors that regulate some of these trait differences, but the  
81 evolutionary mechanisms underlying these genetic differences remain poorly understood.

82  
83 Cave and surface populations are interfertile under laboratory conditions, and we recently  
84 identified a surprising amount of historical and contemporary gene flow between surface and cave  
85 populations<sup>36</sup>. The presence of admixture between populations raises the possibility that gene  
86 flow is a critical driver of trait evolution<sup>36</sup>. Unlike most caves, the Chica cave contains fish that  
87 appear to exhibit high levels of phenotypic variation, and fish are present across four pools that  
88 differ in proximity to the cave entrance, nutrient input, and physicochemical properties (e.g.,  
89 dissolved oxygen) (Fig. 1A)<sup>9,40–42</sup>. Historical surveys suggested that fish exhibit a morphological  
90 gradation in troglotic traits across pools, potentially shaped by environmental variation within  
91 the cave and ongoing influx of surface and cave morphs from underground waterways that feed  
92 into the cave<sup>9</sup>. Thus, this cave provides a natural system to study the effects of hybridization on  
93 trait evolution across a variable environment. Quantification of trait variation and formal tests for  
94 hybridization have yet to be conducted. Here we leverage robust differences in behavior and  
95 morphology between surface and cavefish populations of Mexican tetras, combined with whole  
96 genome sequencing, to investigate the ancestry of putative hybrids in Chica cave and to examine  
97 the genetic basis of trait variability across a heterogeneous environment.

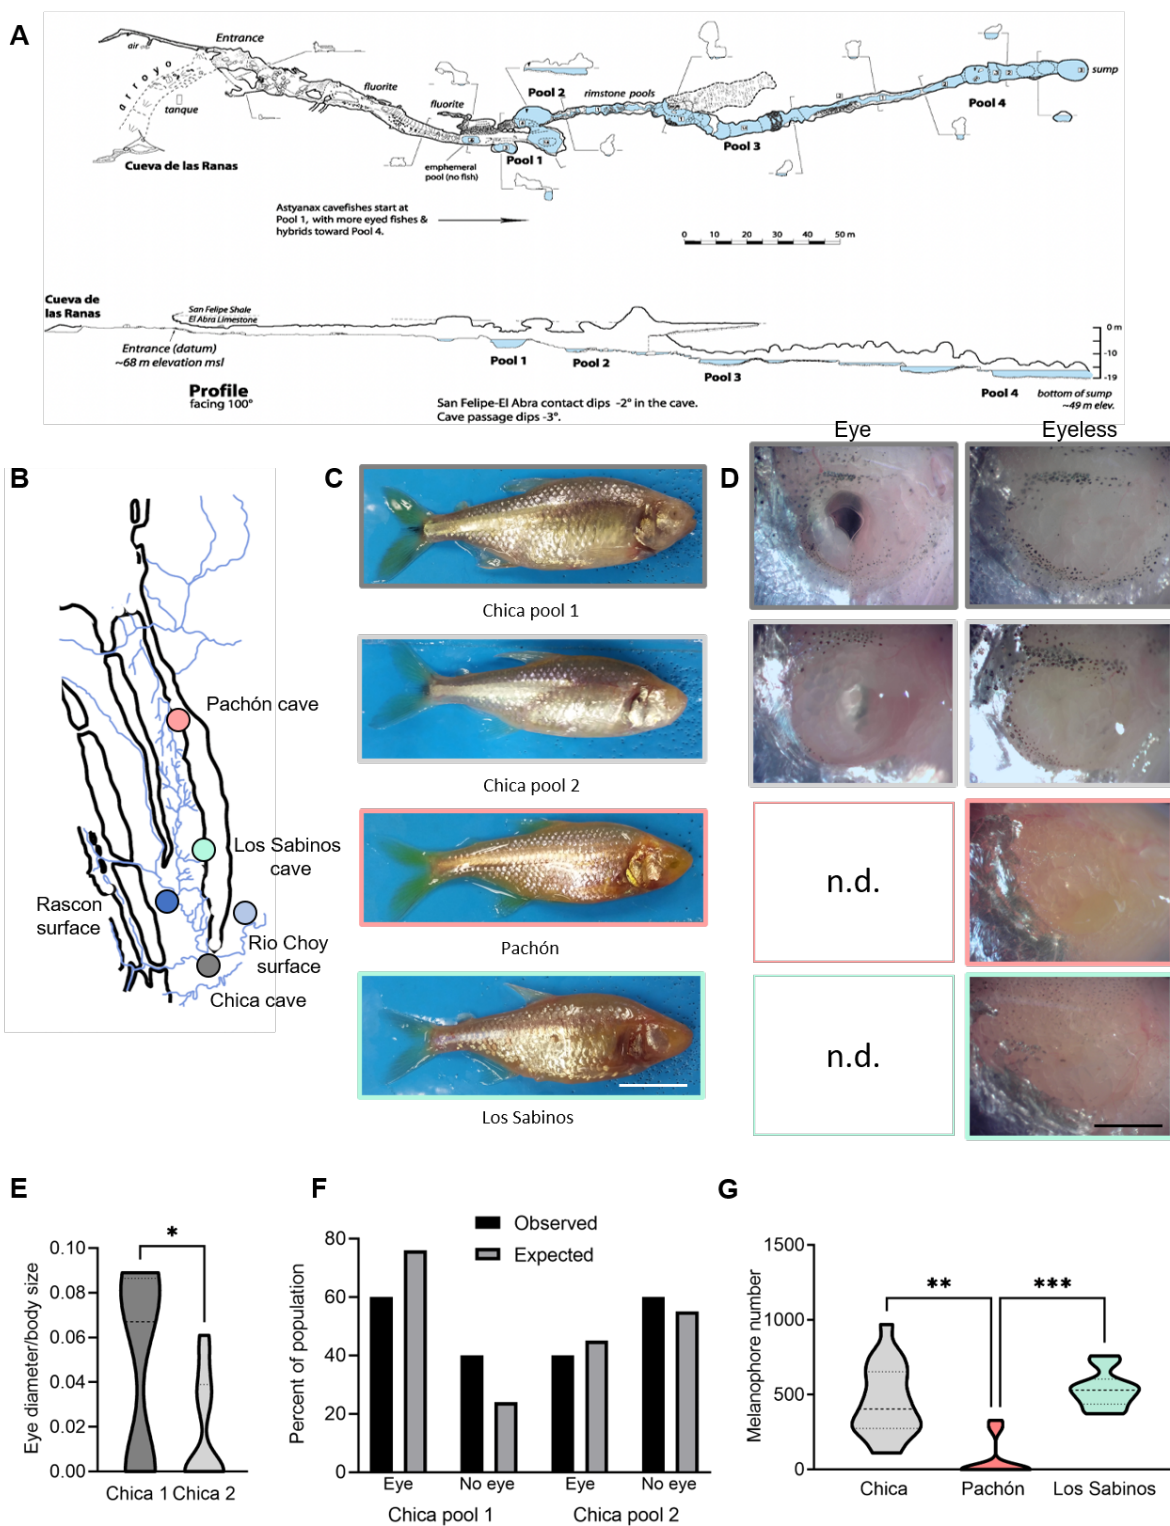

98 **Figure 1.** (A) Map of Chica cave modified with permission from <sup>43</sup>. (B) Collection locations for cave and  
 99 surface populations. For the two surface populations, the collection location for Río Choy is represented by  
 100 a light blue circle and the collection location for Rascón is represented by a dark blue circle. (C)  
 101 Representative images of wild-caught fish. Scale bar denotes 1 cm. (D) Representative images of eye

102 morphology variations in Chica pools 1 and 2 and complete eye loss in wild-caught Pachón and Los Sabinos  
103 cave populations is denoted with “n.d.” for “no data” since there are no eyed fish present in these two  
104 populations. (E) Eye diameter is reduced in Chica pool 2 fish compared to pool 1 ( $*p < 0.05$ , Unpaired t-test,  
105  $t=1.88$ ,  $df=17$ ). Eye size was corrected to body length. (F) Eye morphology in Chica fish fits within expected  
106 outcome. Chica 1: observed 60% eye 40% no eye; expected 55% eye, 45% no eye,  $P > 0.45$  Binomial test.  
107 Chica 2: observed 40% eye, 60% no eye; expected 24% eye, 76% no eye,  $P > 0.34$  Binomial test. (D)  
108 Pigment quantification showing differences in melanin pigmentation in different populations ( $p < 0.001$ , KW  
109 statistic=18.04, Kruskal-Wallis test with Dunn’s multiple comparison test: Chica vs Pachón,  $p < 0.001$ ; Chica  
110 vs Los Sabinos,  $p=0.88$ ; Pachón vs Los Sabinos,  $p < 0.001$ ). Pigmentation are more variable among  
111 different cave populations, Brown-Forsythe test,  $P=0.03$ ; Bartlett’s test,  $P=0.04$ .

112  
113 We first conducted morphological and population genomic analysis to verify whether Chica fish  
114 represent hybrids between surface and cave populations. We also asked whether variation in  
115 morphological traits and allele frequencies are present between pool microenvironments within  
116 Chica cave. We collected adult fish from two adjacent pools in Chica cave that are partially  
117 hydrologically separate, referred to as Pool 1 and Pool 2 (Fig. 1A). We also collected adult fish  
118 from two non-admixed caves in the Sierra de El Abra regions, Pachón and Los Sabinos (Fig  
119 1B,C). We scored wild-caught fish for two morphological traits, eye size and pigmentation, which  
120 previously have been qualitatively described as showing high variation within Chica cave  
121 compared to other cave populations. In agreement with laboratory stock populations, eyes were  
122 absent in wild-caught fish from Pachón and Los Sabinos caves (Figure 1D, Extended Data Figure  
123 1). In contrast, the presence or absence of eyes was highly variable in wild-caught fish from both  
124 pools within Chica cave. Overall eye diameter was significantly larger in Chica Pool 1 fish  
125 compared to Pool 2 individuals ( $p < 0.05$ , Unpaired t-test,  $t=1.69$ ,  $df=17$ ). Additionally, the sample  
126 from Chica Pool 1 contained more fish with eyes present (60%) than those with no eyes (40%)  
127 while the sample from Chica Pool 2 contained fewer fish with eyes (40%) and increased numbers  
128 with no eyes (60%) (Figure 1F). Binomial analysis demonstrated that the observed rate of the eye  
129 phenotype fit within expected outcome range (Chica Pool 1,  $p = 0.45$ ; Chica Pool 2,  $p = 0.34$ ).

130

131 We observed reduced melanin pigmentation levels in all cavefish, but these reductions vary  
132 among different cave populations. Pachón cavefish are considered largely albinic, while Los  
133 Sabinos retain vestigial melanocytes that result in a reduced pigmentation pattern compared to  
134 surface morphs<sup>44,45</sup>. Quantification of melanin pigmentation in wild-caught Pachón and Los  
135 Sabinos revealed comparable patterns to previous reports in lab-reared fish<sup>44,45</sup> (Figure 1G).  
136 Although a number of pigmented individuals were present within the wild-caught Pachón and Los  
137 Sabinos populations, we observed low overall levels in the variability of melanin patterns within  
138 these cave populations. Interestingly, robust differences in the number of melnophores were  
139 observed between different populations of cavefish (Dunn's multiple comparison, Chica  
140 vs.Pachon,  $p < 0.01$ ; Pachon vs Los Sabinos,  $p < 0.01$  Fig 1G; Extended Data Figure 1).  
141 Interestingly, the standard deviations between populations was significantly different, indicating  
142 that Chica cavefish are more variable in melanin morphology patterns (Brown-Forsythe test,  
143  $p=0.03$ ; Bartlett's test,  $p=0.04$ ). Taken together, these findings support the hypothesis that fish  
144 from Chica cave are the result of surface-cave hybridization and exhibit a high degree of  
145 phenotypic variability that differs between microenvironments within the Chica cave.

146  
147 To identify the genetic basis of phenotype variability, we used whole-genome resequencing to  
148 conduct admixture analyses and genomic ancestry mapping in Chica cavefish to test for evidence  
149 of hybridization. We also used whole-genome resequencing to examine population structure  
150 between fish from Pools 1 and 2 within Chica cave, three other cave populations (Pachón, Los  
151 Sabinos, and Tinaja), and two surface populations (Río Choy and Rascón) (Fig. 2A,B). Our  
152 analyses revealed ongoing gene flow between Chica cave, Río Choy, and Tinaja cave  
153 populations (Fig. 2C), and confirmed that the Chica cave population represents a hybrid swarm  
154 resulting from over 2,000 generations of interbreeding between the nearby surface fish (from Río  
155 Choy/Tampaón) and southern El Abra cavefish (Fig. 2D; Extended Data Tables 7-8;  
156 Supplementary Information). This analysis indicated low levels of overall genome-wide

157 divergence between fish from Chica cave Pool 1 and Pool 2, suggesting that gene flow is high  
158 among pools within Chica cave (Fig. 2E). Supporting this notion, all Chica individuals exhibited  
159 highly similar global ancestry proportions from surface versus cave parental populations (Pool 1  
160 Cave Ancestry: Mean  $\pm$  SE =  $0.755 \pm 0.004$ ; Pool 2 Cave Ancestry: Mean  $\pm$  SE =  $0.756 \pm 0.003$ ;  
161 see Supplementary Information). Furthermore, the length distribution of ancestry tracts derived  
162 from the surface parental population did not differ between Chica pools (Extended Data Tables  
163 7-8). Together, this indicates that gene flow from the surface population does not differ  
164 significantly between pools.

165  
166 Despite high levels of gene flow between pools, analysis of sequence divergence revealed  
167 several highly localized regions of genomic divergence between fish from adjacent pools within  
168 Chica cave, reflecting the morphological differences we observed between these pools (Fig. 2E).  
169 In genomic outlier windows where absolute genetic distance (i.e.,  $D_{xy}$ ) between Chica pools was  
170 in the top 5% of values, fish from Pool 2 were more likely to harbor alleles derived from the nearby  
171 southern El Abra cave populations (i.e., Tinaja) compared to Pool 1 (Wilcoxon rank sum test:  $W$   
172 =  $2.6511e+13$ ,  $p < 2.2e-16$ ). Specifically, 50.96% (371 out of 728) of the outlier windows with  
173 exceptionally high genetic divergence between pools contained a higher proportion of sites  
174 derived from cave (i.e., Tinaja) ancestry in Pool 2, whereas 39.56% (288 out of 728) had a higher  
175 proportion of sites derived from cave ancestry in Pool 1. The remaining 9.47% (69 out of 728) of  
176 outlier windows did not exhibit differences in ancestry between pools, which may be due to genetic  
177 differences that have accumulated via drift and/or regions that were not ancestry informative (i.e.,  
178 the Hidden Markov Model was unable to accurately delimit ancestry blocks). We observed a  
179 positive correlation between the difference in local ancestry between pools and genetic distance  
180 between pools (Pearson's correlation:  $r=0.0012$ ,  $n=7,345,340$ ,  $p=0.0011$ ), indicating that the  
181 greater proportion of cave ancestry maintained in Pool 2 compared to Pool 1 drives genetic



182 differences between the pools. Together, this demonstrates that gene flow has played a key role  
183 in driving genetic variation in this system and may facilitate evolution on a local scale.  
184

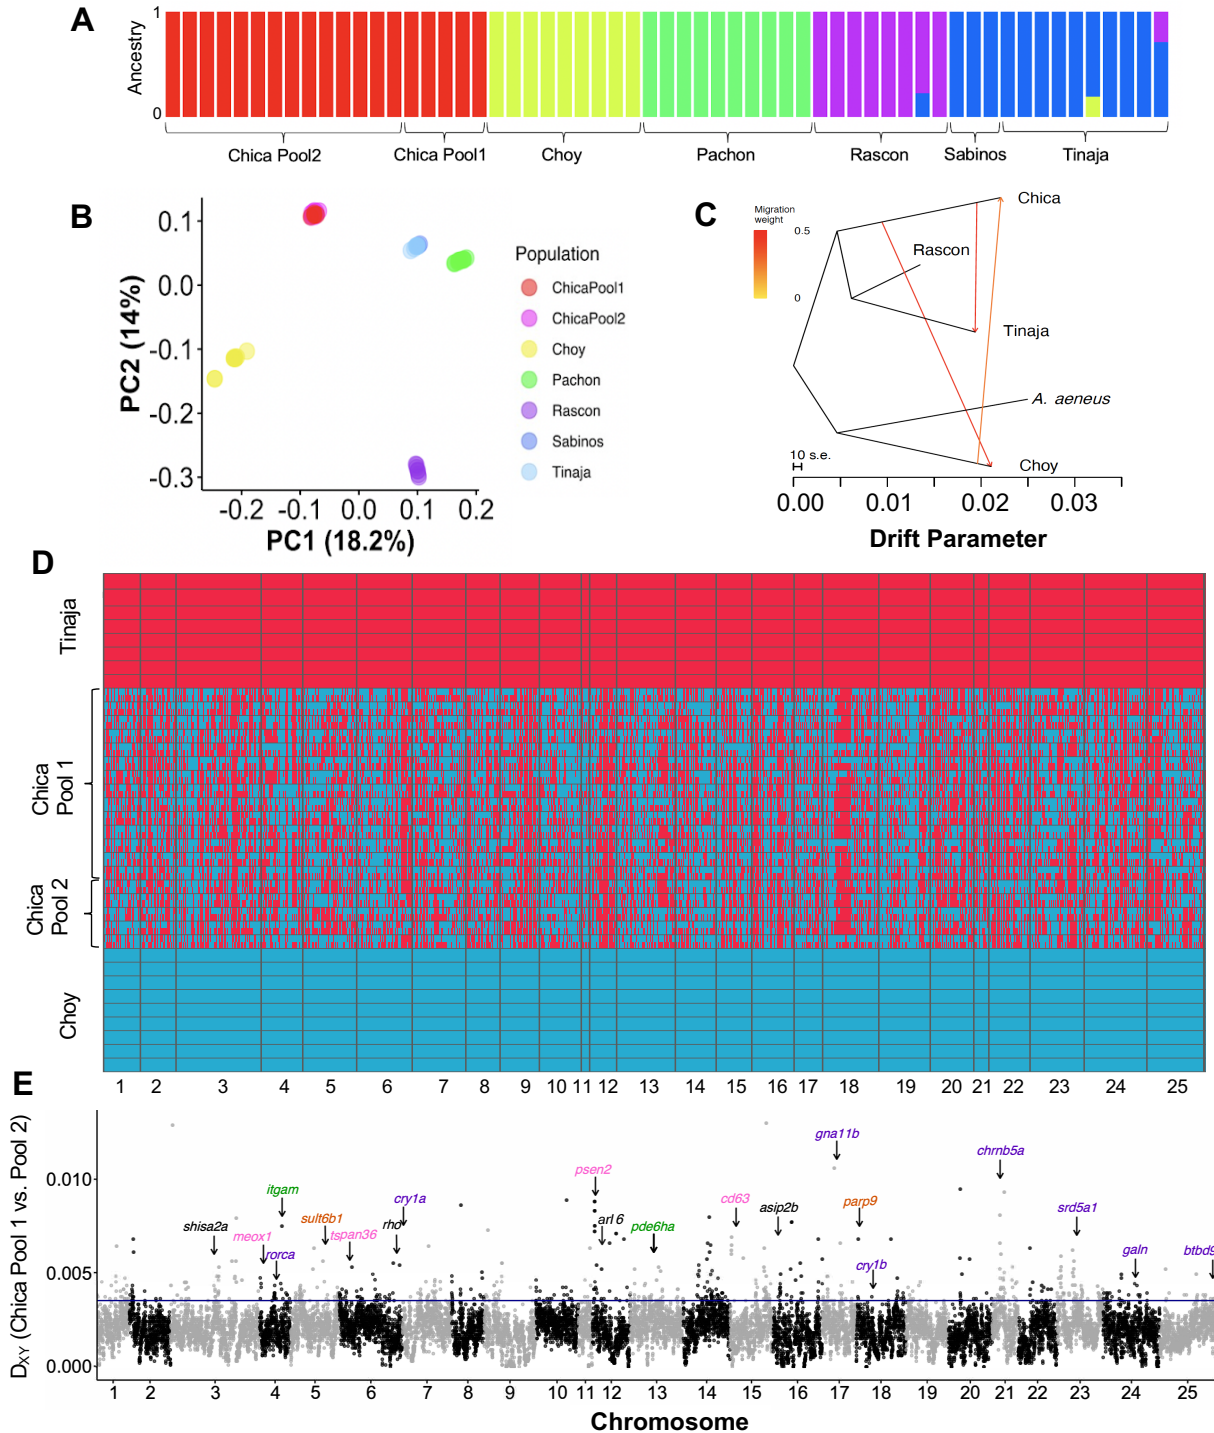

185

186 **Figure 2.** (A) ADMIXTURE barplot showing ancestry proportions for K=5. (B) Biplot of scores for the first two PCs. Note

187 that individuals from Chica cave Pool 1 and Pool 2 overlap and individuals from Tinaja cave and Los Sabinos cave  
188 overlap. (C) Treemix tree with three migration events and rooted with the outgroup, *A. aeneus*. New lineage surface  
189 population (Río Choy) groups with *A. aeneus*, and old lineage surface (Rascón) and caves (Chica and Tinaja) all group  
190 together. Migration events are present between Chica cave and the geographically close surface population, Río Choy,  
191 and between Tinaja and Chica caves. (D) Local ancestry derived from surface (Río Choy, blue) versus cave (Tinaja,  
192 red) parental populations in hybrid fish from Chica cave. Each row represents a diploid individual with two haplotypes  
193 stacked on top of one another. (E) Absolute genetic divergence (Dxy) between fish from Chica cave Pool 1 versus Pool  
194 2 in 50 kb windows across the genome. Locations are indicated for several top candidate genes with high divergence  
195 between Chica pools and biological functions related to sleep/circadian cycle (purple), eye size/morphology (green),  
196 metabolism (orange), and pigmentation (pink), or that are pleiotropically involved in two or more of these pathways  
197 (black) (see Extended Data Table 11). The 95<sup>th</sup> percentile is delimited by a horizontal line.

198

199

200 Out of all functionally annotated protein-coding genes, those with a high degree of sequence  
201 divergence between pools (i.e., genetic distance in the top 5% of all genes) associated well with  
202 the characteristic suite of phenotypic differences typically present between non-admixed cave  
203 and surface populations (Extended Data Table 9). These genes with exceptional divergence  
204 between pools were significantly enriched for ontologies related to traits that differ between non-  
205 admixed surface and cave populations, including pigmentation (*bloc1s3*, *cd63*, *psen2*, *sox10*,  
206 *tspan36*, *meox1*, *asip2b*, *arl6*, *rab38c*), eye development and light detection (*c1qa*, *itgam*, *rho*,  
207 *pde6ha*), sensory processing by the lateral line neuromast (*rsph9*, *shisa2a*), metabolism (*parp9*,  
208 *sult6b1*), and sleep and the circadian cycle (*btbd9*, *srd5a1*, *mc3r*, *chrnb5a*, *galn*, *gna11b*, *rorca*,  
209 *cry1a*, *cry1b*) (Fisher's exact tests,  $p < 0.05$ ; Supplementary Information, Extended Data Tables  
210 9-10). This set of 26 outlier genes with ontologies related to phenotypic differences observed  
211 between non-admixed cave and surface populations provided strong candidates for local  
212 adaptation. We used a deep convolutional neural network approach implemented in diploS/HIC<sup>46</sup>  
213 to formally test for signatures of selection on these genes. We found that 21 (81%) of the 26  
214 candidate genes occur within regions of the genome that appear to have experienced selective  
215 sweeps in one or both Chica pools (Extended Data Table 11). Furthermore, 20 (77%) of the 26  
216 candidate genes for local adaptation also show extreme divergence (genetic distance in the top

217 5% of all genes) in one or more comparisons between cave and surface population pairs that do  
218 not show evidence of recent admixture (Extended Data Table 9), potentially pointing to general  
219 trends in the genetic underpinnings of cave evolution. These genes are strong candidates  
220 underlying the morphological differences in eye size and pigment we observed between pools  
221 within Chica cave, and suggest that adaptive behavioral (i.e., sleep) differences may also be  
222 present between pools. Taken together, our results indicate that hybridization may interact with  
223 varying selection pressures between different pool microenvironments within Chica cave to  
224 recapitulate phenotypic differences associated with divergent selection between cave and surface  
225 environments.

226  
227 We observed a number of additional factors that further suggest the genetic differences identified  
228 in candidate genes for local adaptation in Chica cave could have functional consequences. We  
229 used *in silico* prediction with SIFT<sup>47</sup> and VEP<sup>48</sup> to identify mutations with deleterious effects that  
230 occur at higher frequencies in cavefish and re-analyzed transcriptional data obtained from Tinaja  
231 and Río Choy fry at 30 days post fertilization (dpf)<sup>49</sup>. These analyses revealed striking patterns of  
232 differential expression between lab-raised fry from surface versus cave populations and coding  
233 variants that affect protein function (see Supplementary Information, Extended Data Tables 11-  
234 13). Out of the 26 candidate genes with ontologies related to cave adapted phenotypes, 21 were  
235 expressed at 30 dpf. Of those 21 genes, 14 (67%) showed significant differential expression  
236 between cave and surface fish (Extended Data Table 13). We also identified putatively deleterious  
237 coding changes in five of our candidate genes with ontologies associated with sleep and the  
238 circadian cycle. One notable mutation is present in the gene cryptochrome circadian regulator 1a  
239 (*cry1a*), a transcriptional repressor. Cryptochromes play a highly conserved role in circadian clock  
240 regulation across plants and animals<sup>50</sup>. Knockout of *cry1a* results in defects in locomotor activity  
241 and behavioral rhythms in zebrafish<sup>51</sup>, and mutations in the human *cry1* ortholog are associated  
242 with a circadian rhythm sleep disorder (delayed sleep phase syndrome, DSPS)<sup>52</sup>. We observed

243 that *cry1a* exhibits a nonsynonymous mutation, R263Q, that is present in Chica, Tinaja, and  
244 Pachón cave populations but not in Río Choy or Rascón surface populations. To determine  
245 whether this mutation is unique to the cavefish lineages, we examined an alignment of 284 CRY1  
246 orthologs across 266 animal species (including invertebrates) downloaded from Ensembl  
247 (<https://useast.ensembl.org/>). We also downloaded the CRY1 ortholog for the Somalian cavefish  
248 *Phreatichthys andruzzii* that was available on NCBI (Accession: ADL62679.1). Remarkably, we  
249 found that the R263Q mutation is present in four distantly related cyprinid species from Somalia  
250 (*Phreatichthys andruzzii*)<sup>53</sup> and China (the blind barbel *Sinocyclocheilus anshuiensis*, the golden-  
251 line barbel *Sinocyclocheilus grahami*, and the horned golden-line barbel *Sinocyclocheilus*  
252 *rhinocerosus*), as well as two burrowing rodent species (the naked mole rat, *Heterocephalus*  
253 *glaber*, and the common degu, *Octodon degus*) (Fig. 3). *Phreatichthys* and *Sinocyclocheilus*  
254 cyprinid cavefish have convergently evolved troglomorphic traits that are shared by *Astyanax*  
255 characin cavefish, including reduction or loss of eyes and pigment, and disrupted circadian  
256 cycles<sup>53–55</sup>. The naked mole rat has also evolved<sup>53–55</sup> many of the same characteristic traits associated  
257 with life in the dark, including reduced eye size and function, a disrupted circadian clock, and loss  
258 of sleep<sup>56</sup>. Our *in silico* analyses indicated that the R263Q mutation is predicted to be deleterious  
259 to protein function (Extended Data Table 11). This is supported by the observation that this  
260 position is otherwise highly conserved across plants and animals and occurs within the FAD  
261 binding domain of CRY<sup>57,58</sup> (Fig. 3A). Our findings provide compelling evidence that the R263Q  
262 mutation in the core circadian clock gene *cry1* has convergently evolved up to five times in  
263 cavefish and burrowing mammals (Fig. 3B,C), indicating that a common genetic mechanism may  
264 contribute to disruption of sleep behavior and circadian rhythm in subterranean vertebrates.

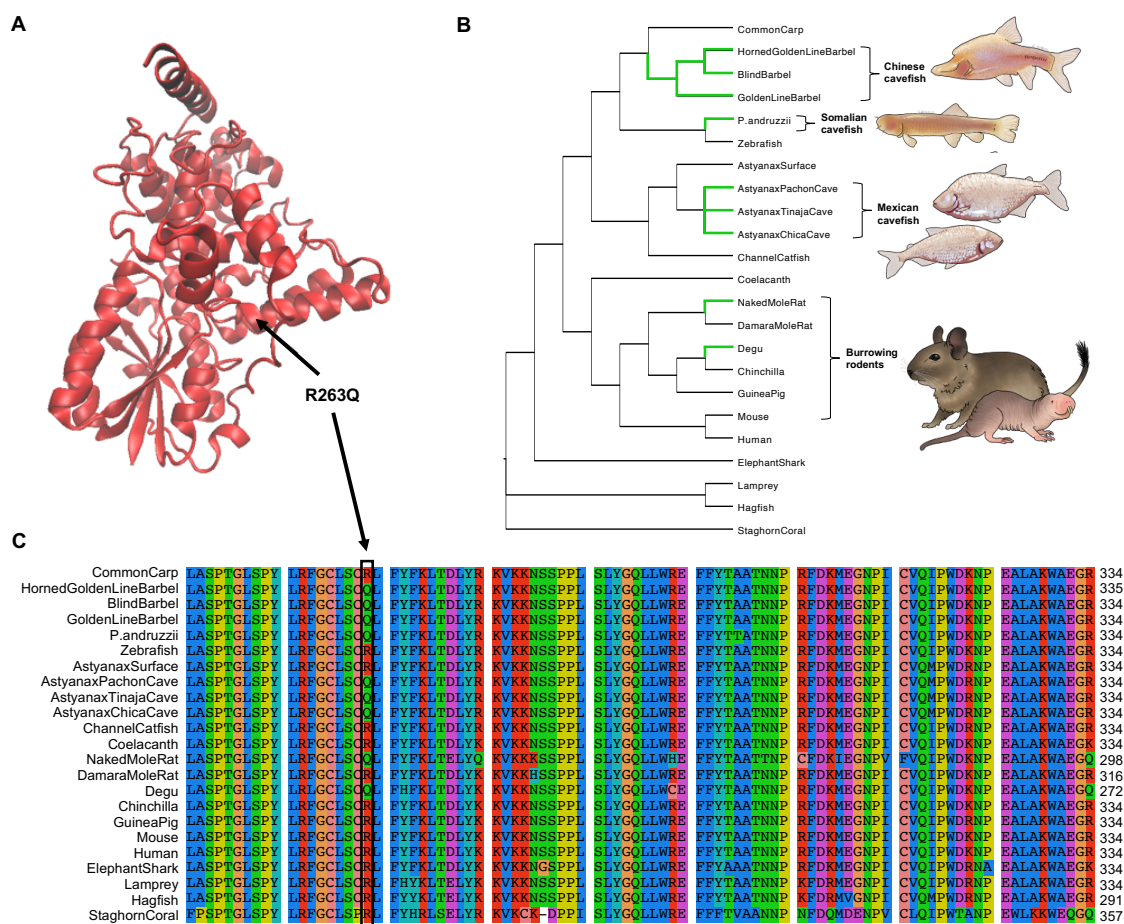

265  
 266 **Figure 3.** (A) Model of *Astyanax* Pachon cavefish CRY1A protein based on crystal structure of mouse CRY1 (PDB:  
 267 6kx7). The model for the *Astyanax* Pachon cavefish protein was generated with SWISS-MODEL and the comic  
 268 structure was visualized with VMD (version 1.9.4). The location of R263Q (in the  $\alpha$ 10 within the FAD binding pocket) is  
 269 indicated with an arrow. This image was made with VMD/NAMD/BioCoRE/JMV/other software support.  
 270 VMD/NAMD/BioCoRE/JMV/ is developed with NIH support by the Theoretical and Computational Biophysics group at  
 271 the Beckman Institute, University of Illinois at Urbana-Champaign. (B) Species tree for 23 animal species, selected to  
 272 include subterranean lineages and their epigeal relatives (based on the species tree available from Ensembl release  
 273 102 and <sup>55,59,60</sup>). Branches where the R263Q mutation has evolved are highlighted in green. Illustrations depict  
 274 *Astyanax* Mexican cavefish (Pachon cavefish top, Tinaja cavefish bottom), degu, and naked mole rat. (C) Section of  
 275 multiple sequence alignment for CRY1 orthologs spanning sites 187 – 289 in the *Astyanax* CRY1A protein. The arginine  
 276 to glutamine mutation at *Astyanax* site 263 is indicated with a black box.

277  
 278

279 Together, the enrichment of genes with ontologies related to sleep and the circadian cycle in our  
280 list of candidates with exceptionally high divergence between Chica pools and our observation of  
281 large-effect, cave-derived mutations in several of these genes suggests that sleep behavior may  
282 differ between fish from different pools within Chica cave. Multiple laboratory-bred cavefish  
283 populations exhibit convergence on sleep loss and increased locomotor activity<sup>29,39</sup>. While these  
284 behavioral differences are proposed to enhance foraging opportunity in nutrient-poor cave  
285 environments<sup>28</sup>, sleep has not been assayed in wild caught fish and it is not known whether sleep  
286 and activity differ based on local cave environments. To directly test whether the genomic  
287 differences we observed in candidate genes for sleep differences within Chica cave associate  
288 with functional differences, we analyzed behavioral variation in wild-caught fish from Chica Pool  
289 1 and Pool 2. We also assayed non-admixed cavefish from Los Sabinos and Pachón for  
290 comparison. We measured sleep duration and locomotor activity in wild-caught fish under  
291 standard laboratory settings. We observed that total sleep in wild-caught Pachón cavefish is  
292 significantly reduced compared to Los Sabinos cavefish, similar to what is observed in fish derived  
293 from these populations in the laboratory (Fig. 4 A,B) (Dunn's multiple comparison,  $p < 0.01$ ). This  
294 provides evidence that the sleep loss observed in lab-reared stocks is replicated in wild-caught  
295 fish<sup>39,61</sup>. The duration of sleep in Chica fish from Pool 1 was significantly greater than sleep in fish  
296 from Pool 2 (Dunn's multiple comparison,  $p < 0.05$ ). The increased sleep duration from Chica  
297 Pool 1 fish was caused by an increase in number of sleep bouts compared to fish from both Chica  
298 Pool 2 and Pachón cave (Fig. 4B) (Dunn's multiple comparison, Chica pool 2,  $p < 0.05$ , Pachon  
299  $p < 0.05$ ). Sleep bout length was reduced in fish from Chica Pool 2 and Pachón cave populations  
300 compared to fish from Chica Pool 1 (Fig 4C), though this comparison was not statistically  
301 significant. These differences in sleep cannot be explained by hyperactivity, as the average  
302 activity during periods of wakefulness (waking activity) did not differ between any of the  
303 populations (Fig. 4E). Therefore, hybrid Chica fish exhibit pool-specific differences in sleep, with  
304 fish from Pool 2 largely phenocopying Pachón cavefish and fish from Pool 1 exhibiting a greater

305 sleep duration, similar to what has been previously observed in laboratory stocks of surface  
306 fish<sup>29,39</sup>. These results reveal the presence of behavioral differences between adjacent pools  
307 within Chica cave, with Pool 2 being more cavefish-like than Pool 1. This is in agreement with our  
308 genomic analyses, which found more cave ancestry maintained in Pool 2 compared to Pool 1  
309 specifically in genomic regions of high divergence that contained genes related to phenotypes  
310 putatively implicated in local adaption in this system.

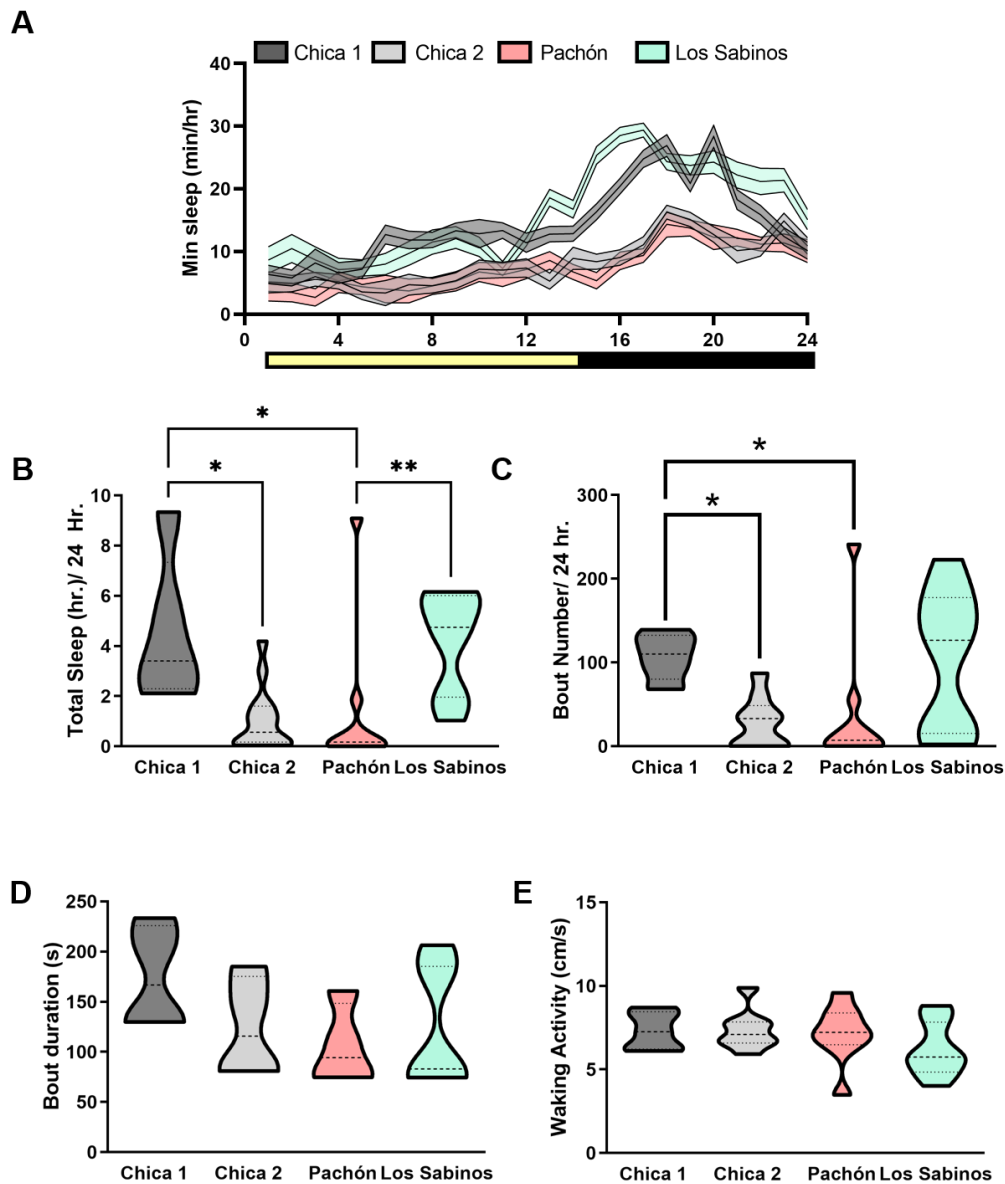

311  
312 **Figure 4.** Sleep variation between and within wild-caught *A. mexicanus* cave populations. (A) Twenty-four hour sleep  
313 profiles in Chica Pool 1, Chica Pool 2, Pachón and Los Sabinos fish (B) Total sleep duration is variable among

314 different populations of wild-caught fish (Kruskal-Wallis test,  $P < 0.001$ , KW statistic = 17.55). Chica Pool 1 fish sleep  
315 significantly longer than Chica Pool 2 fish (Dunn's multiple comparison,  $p < 0.05$ ). Wild-caught Pachón cavefish show  
316 reduced sleep compared to Chica Pool 1 (Dunn's multiple comparison,  $p < 0.05$ ). (C) Number of sleep bouts is  
317 variable in different cave populations (Kruskal-Wallis test,  $P < 0.05$ , KW statistic = 10.62. Chica Pool 2 and Pachón  
318 fish have reduced sleep bout numbers compared to Chica Pool 1 (Dunn's multiple comparison, Chica Pool 2,  $p <$   
319  $0.05$ , Pachón,  $p < 0.05$ ). (D) Sleep bout duration is not altered in any population of cavefish (Kruskal-Wallis test,  $P >$   
320  $0.34$ , KW statistic = 3.46. (E) Waking activity is not altered among cave populations (Kruskal-Wallis test,  $P > 0.3$ , KW  
321 statistic = 3.65).

322  
323 We conclude that genetic admixture across different environments produced substantially  
324 different phenotypes in very close geographic proximity. Our findings also imply that stronger  
325 selection against surface ancestry in Pool 2 of Chica cave could be maintaining differences in  
326 genes important to local cave pool via adaptation, rather than differential gene flow of each Chica  
327 pool and the local surface population. These results are remarkable given that the pools are  
328 separated by just 10 m. Additionally, we found that genes which are exceptionally divergent  
329 between the two cave pools associate well with the phenotypic differences observed. Notably,  
330 genes identified as highly divergent across pool microenvironments are also associated with  
331 phenotypes involved in nonadmixed surface and cave populations. These findings provide  
332 unprecedented insight into the genetic basis of local adaptation across varying environments in  
333 hybrid populations. Lastly, we identified a coding variant in the core circadian clock gene *cry1* that  
334 has convergently evolved in other distantly related cave-dwelling fish species and burrowing  
335 mammals. This suggests that a common genetic mechanism may contribute to disrupted  
336 circadian rhythms across multiple subterranean vertebrate lineages that have adapted to live in  
337 constant darkness.

338  
339 A rapidly growing body of work is demonstrating that introgressive hybridization often drives  
340 patterns of phenotypic evolution and may play an integral role in the evolutionary processes of  
341 local adaptation and speciation<sup>12</sup>. A number of studies have shown that behavioral variation can  
342 result from introgressive hybridization (e.g., song in hybrid Darwin's finches<sup>62</sup>, mate choice in



343 hybrid baboons<sup>63</sup>, defensive behavior in hybrid honey bees<sup>23</sup>), providing new substrate for  
344 selection to act upon. Hybridization has also been proposed to have influenced behavioral novelty  
345 in humans<sup>64,65</sup>. Here we mapped the genetic basis of complex behavioral differences resulting  
346 from the interplay between hybridization and selection in a vertebrate system. This demonstrates  
347 that hybridization may play an underappreciated role in shaping behavioral variation and  
348 evolution. Therefore, the identification of hybridization-mediated evolution in the *A. mexicanus*  
349 that inhabit Chica cave establishes this system as a model to study the genetic basis of evolution  
350 in complex behavioral and morphological traits.

351

352

353

## 354 **Methods**

### 355 *Study system*

356 Evidence suggests that there have been at least two colonization events of northern Mexico by  
357 surface dwelling *A. mexicanus*, typically referred to as the “old” and “new” lineage. One lineage  
358 of surface fish colonized the caves in the El Abra region and a separate lineage of surface fish  
359 subsequently colonized the northern Guatemala region and western Micos region caves of  
360 Northeastern Mexico. While we now know that these two lineages and their invasion of the caves  
361 were not timed in line with the “old” and “new” designations<sup>37</sup>, we use this shorthand here since  
362 these labels are consistent with past work<sup>33,34,36,66</sup>. The surface fish within the Rascón/Gallinas  
363 river system are most similar to the old lineage cavefish and were likely isolated from colonization  
364 by the new lineage surface fish due to a 105 m vertical waterfall<sup>37</sup>. Cavefish within the El Abra  
365 region that descended from old lineage of surface ancestors are now within close geographic  
366 proximity to surface fish from the new lineage.

367

368 Fish occupy multiple pools within Chica cave that naturally differ in ecology. Whether the Chica  
369 cave population came from the old or new lineage stock has been the subject of much debate in  
370 the cavefish community. Fish from Chica cave show higher genetic differentiation from the rest of  
371 the El Abra cave populations, which some have interpreted as evidence of an independent  
372 invasion event<sup>34</sup>. However, this pattern could also be explained by hybridization with local surface  
373 populations<sup>67</sup>. In accordance with this hypothesis, recent phylogenetic analyses have revealed  
374 that fish from Chica cave possess new lineage mitochondrial DNA and old lineage nuclear DNA,  
375 indicative of historical introgression<sup>33,35</sup>.

376  
377 Identifying the genetic underpinnings of behavioral evolution can be especially challenging in  
378 natural populations<sup>68,69</sup>. A genomic signature of local adaptation is most detectable when gene  
379 flow is high among populations in different environments<sup>70,71</sup>, as gene flow homogenizes the  
380 background level of divergence between populations while selection maintains differentiation at  
381 regions important to local adaptation. High levels of gene flow between the Chica cave and  
382 surface population together with strong selection for adaptation to the cave environment are  
383 predicted to shape patterns of divergence across the genome and provide insight into the genes  
384 important for maintaining cave phenotypes. Therefore, this system provides the unique  
385 opportunity to investigate the genetic basis of adaptive traits.

386  
387 *Sequencing and Genotyping*

388 We used whole genome resequencing and population genomic analyses to (1) characterize  
389 population structure and genetic relationships between and within the Chica cavefish, three other  
390 cavefish populations, and two surface populations (2) identify candidate regions for local  
391 adaptation with high levels of genetic differentiation between Chica pools, and (3) test for  
392 signatures of introgression between Chica cave and other nearby cave and surface populations.  
393 All sequencing used in these analyses originated from wild-caught fish collected from two

394 adjacent pools within Chica cave (Pool 1, approximately 91 m from the entry, and Pool 2,  
395 approximately another 10 m into the cave; Fig. 1A).

396  
397 Fin clips were collected from adult fish from Chica cave in 2015 and stored in 80% ethanol. We  
398 sequenced a total of 19 *A. mexicanus* samples from Chica cave (five from Pool 1 and 14 from  
399 Pool 2) using 125 bp paired end reads on an Illumina HiSeq 2500 at the University of Minnesota  
400 Genomics Center. Fin clips were collected from adult fish from Los Sabinos cave (n=3) in 2015  
401 and were sequenced using 150 bp paired end reads on an Illumina NovaSeq S4. Genomic  
402 libraries for all Chica samples and two of the Los Sabinos samples (Sabinos\_T3076\_S26 and  
403 Sabinos\_T3093\_S27) were prepared using Illumina TruSeq v3 Nano DNA Sample Prep Kits.  
404 The genomic library for the third Los Sabinos sample (Sabinos1) was prepared using a  
405 Chromium Genome Library Kit and Gel Bead Kit v2 and a Chromium Genome Chip Kit v2. We  
406 obtained whole genome resequencing data for Pachón cavefish samples (n = 10) from a  
407 previously published study <sup>37</sup>.

408  
409 To investigate recent patterns of introgression between Chica cave and surface fish, we also  
410 obtained *A. mexicanus* sequence data from fish from one other cave population in the El Abra  
411 region that is not heavily admixed (Tinaja, n = 10), a nearby new lineage surface population (Río  
412 Choy, n = 9), and an old lineage surface population (Rascón, n = 8) <sup>37</sup>. It has been hypothesized  
413 that caves within the southern El Abra region exchange migrants through subterranean  
414 connections, and Tinaja was previously shown to contain fish with mostly cave-like phenotypes.  
415 Thus, Tinaja cavefish sequence can provide a reference to identify cave alleles in the putative  
416 hybrid swarm present in Chica cave.

417  
418 Río Choy contains new lineage surface fish and is a tributary of the Tampaón River, which is  
419 believed to be the source of surface fish in Chica cave. Rascón is a tributary of the Gallinas River,

420 and contains old lineage surface fish<sup>37</sup>. Thus, including genomic data from Tinaja, Río Choy, and  
421 Rascón in our analyses provides a means to test for recent introgression between new lineage  
422 surface fish and old lineage cave fish within Chica cave. Previously published data from a closely  
423 related congener, *Astyanax aeneus* (n=1)<sup>37</sup>, was also included to serve as an outgroup in tests  
424 for introgression. Pachón, Tinaja, Río Choy, Rascón, and *A. aeneus* samples were all previously  
425 sequenced as 100 bp paired end reads on an Illumina HiSeq2000 at The University of Minnesota  
426 Genomics Center<sup>37</sup>. Raw sequencing data for these samples was downloaded from NCBI (SRA  
427 Accession Numbers SRP046999, SRR4044502, and SRR4044501).

428  
429 We conducted genotype calling following the GATK Best Practices<sup>72-74</sup> (Extended Data Table 1).  
430 Adapters were trimmed from raw reads using Cutadapt v1.2.1. We trimmed samples for quality  
431 using Trimmomatic v0.30 and specified a minimum quality score of 30 across a 6 bp sliding  
432 window and discarded reads with a length of <40 nucleotides. Reads were aligned to the surface  
433 *Astyanax mexicanus* genome (*Astyanax\_mexicanus*-2.0, downloaded from NCBI) using bwa  
434 v0.7.4<sup>75</sup>. We used Picard v2.3.0 (<http://broadinstitute.github.io/picard/>) to remove duplicates and  
435 add read group information and used samtools v1.7<sup>76</sup> to split de-duplicated bams into mapped  
436 and unmapped reads. Mapped bams were used to generate per-individual gvcfs with the Genome  
437 Analysis Tool Kit (GATK) v3.7.0 HaplotypeCaller tool. We used the GenotypeGVCFs tool in GATK  
438 v3.8.0 to produce vcf files for each chromosome and unplaced scaffolds that include all individuals  
439 (and include invariant sites). The SelectVariants and VariantFiltration tools in GATK v3.8.0 were  
440 used to apply hard filters. We subset vcfs for each chromosome and unplaced scaffolds into  
441 invariant, SNPs, and mixed/indel sites and applied filters separately following GATK best  
442 practices (Supplementary Table 1). We then used the MergeVcfs tool in GATK v4.1.4 to re-  
443 combine all subset VCFs for each chromosome and unplaced scaffold. Indels and the 3 bp region  
444 around each indel were removed using a custom python script. We used the vcftools<sup>77</sup> --exclude-  
445 bed option to remove repetitive regions identified by WindowMasker and RepeatMasker<sup>78</sup>. We

446 also used vcftools to only retain biallelic SNPs, to remove sites with greater than 20% missing  
447 data within each population, and to remove variants with a minor allele frequency <1%. This  
448 resulted in retaining a total of 225,462,242 sites throughout the genome, 3,337,738 of which were  
449 SNPs.

450

451

#### 452 *Population Structure*

453 To quantify the number of distinct genetic clusters (i.e., populations) present among the *A.*  
454 *mexicanus* cave and surface populations, we used ADMIXTURE v1.3.0 and Principal  
455 Components Analysis (PCA). For these analyses, we applied a more stringent missing data filter,  
456 only retaining sites with <10% missing data. To control for linkage between SNPs that cluster  
457 locally on a given chromosome, we thinned SNPs to 1 kb apart and did not include unplaced  
458 scaffolds. This resulted in a set of 678,637 SNPs. We ran ADMIXTURE for each value of K from  
459 two through nine and estimated the best value of K using the Cross Validation (CV) procedure in  
460 ADMIXTURE. The best K was chosen as the value that had the lowest CV error. We used Plink  
461 v1.90 to conduct the PCA. For this analysis, we again thinned SNPs to 1 kb apart, but included  
462 all placed and unplaced scaffolds. This resulted in a set of 733,979 SNPs.

463

464 We calculated absolute genetic divergence (Dxy) and relative genetic divergence (Fst) between  
465 populations and nucleotide diversity (Pi) within populations in non-overlapping 50kb windows  
466 across the genome using the python script popgenWindows.py  
467 ([https://github.com/simonhmartin/genomics\\_general/blob/master/popgenWindows.py](https://github.com/simonhmartin/genomics_general/blob/master/popgenWindows.py)).

468 Fst can be influenced by heterogeneous genetic diversity between populations, and Herman et  
469 al.<sup>37</sup> demonstrated that low Pi in caves can inflate relative divergence estimates in *A. mexicanus*.

470 We therefore chose to use Dxy, which is not affected by levels of nucleotide diversity within  
471 populations, to identify regions of high genetic divergence between Chica pools.

472

473 We calculated Dxy on a site-by-site basis using a custom python script. This allowed us to  
474 calculate mean Dxy for each gene in the *A. mexicanus* genome annotation (v101, downloaded  
475 from [ftp://ftp.ensembl.org/pub/release-101/gtf/astyanax\\_mexicanus/](ftp://ftp.ensembl.org/pub/release-101/gtf/astyanax_mexicanus/)).

476

477

#### 478 *Genome-wide tests for introgression*

479 The population of fish within Chica cave has been hypothesized to be a hybrid swarm between  
480 cavefish originating from other caves in the El Abra region (which enter into Chica cave via a  
481 subterranean connection) and surface fish from the nearby Río Choy/Tampaón river system<sup>9</sup>.  
482 To formally test this hypothesis, we conducted genome-wide tests for introgression between  
483 Chica cavefish and Tinaja cavefish and between Chica cavefish and Río Choy surface fish. We  
484 first used Treemix v1.13<sup>79</sup> to confirm relationships between our focal populations and to visualize  
485 migration events between populations. Treemix builds a bifurcating tree to represent population  
486 splits and also incorporates migration events, which are represented as “edges” connecting  
487 population branches. We first built the maximum likelihood tree (zero migration events) in Treemix  
488 and then ran Treemix sequentially with one through five migration events. For this analysis, we  
489 included individuals from Chica, Río Choy (new lineage surface), Rascón (old lineage surface),  
490 and Tinaja (old lineage cave) *A. mexicanus* populations and the *A. aeneus* individual (outgroup),  
491 and SNPs were thinned to 1kb apart. We supplied this set of 700,502 biallelic SNPs to Treemix,  
492 rooted with *A. aeneus*, and estimated the covariance matrix between populations using blocks of  
493 500 SNPs. Samples Tinaja\_E, Tinaja\_6, and Rascon\_6 were excluded from this analysis because  
494 ADMIXTURE indicated that they were likely early generation hybrids. We calculated the variance  
495 explained by each model (zero through five migration events) using the R script  
496 `treemixVarianceExplained.R`<sup>80</sup>.

497

498 To test our hypothesis that Chica represents a hybrid population resulting from admixture between  
499 the nearby old lineage cave and new lineage surface populations, we used Dsuite v0.4<sup>81</sup> to  
500 conduct formal tests for introgression between (1) Chica cavefish and Tinaja cavefish, and (2)  
501 between Chica cavefish and Río Choy surface fish. If no gene flow is occurring between the fish  
502 in Chica cave and the local surface population, we predict that fish from Chica (which has  
503 previously been shown to group phylogenetically with old lineage cavefish populations) should  
504 share more derived alleles with fish from Rascón (a surface population that is more geographically  
505 distant from Chica but also old lineage) than fish from Río Choy (a surface population that is  
506 geographically close to Chica cave but is new lineage). For this analysis, we supplied the set of  
507 700,502 biallelic SNPs to Dsuite and specified *A. aeneus* as the outgroup. We again excluded  
508 three samples from Tinaja and Rascón with apparent hybrid ancestry. We used the Dsuite  
509 program Dtrios to calculate Patterson's D statistic for all possible trios of populations using the  
510 ABBA-BABA test<sup>82</sup>. The ABBA-BABA test quantifies whether allele frequencies follow those  
511 expected between three lineages (e.g., sister species P1 and P2, and a third closely related  
512 species, P3) under expectations for incomplete lineage sorting (ILS). Observing a greater  
513 proportion of shared derived alleles between P1 and P3 but not P2 or between P2 and P3 but not  
514 P1 than what would be expected by chance (i.e., ILS) indicates introgression. Dsuite requires a  
515 fourth population, P4, to serve as an outgroup and determine which alleles are ancestral versus  
516 derived. Ancestral alleles are labeled as "A" and derived alleles are labeled as "B". ABBA sites  
517 are those where P2 and P3 share a derived allele, and ABAB sites are those where P2 and P4  
518 share a derived allele. The D statistic is calculated as the difference in the number of ABBA and  
519 BABA sites relative to the total number of sites examined. Dsuite uses jackknifing of the null  
520 hypothesis that no introgression has occurred (D statistic = 0) to calculate a p-value for each  
521 possible trio of populations.  
522

523 Dsuite also calculates the admixture fraction, or  $f_4$ -ratio, which represents the covariance of allele  
524 frequency differences between P1 and P2 and between P3 and P4. If no introgression has  
525 occurred since P1 and P2 split from P3 and P4, then  $f_4 = 0$ . The  $f_4$  statistic is positive, this  
526 suggests a discordant tree topology indicative of introgression.

527

### 528 *Local Ancestry Inference*

529 Hybrid genomes exhibit a mosaic of ancestry from their parental populations. A number of recent  
530 studies have shown that hybridization interacts with recombination and selection to shape  
531 patterns of local ancestry along chromosomes<sup>83-87</sup>. Non-random distributions of local ancestry in  
532 hybrid populations can indicate selection. Our goal here was to visualize patterns of introgression  
533 across the genome in Chica cavefish and determine whether more surface ancestry is present in  
534 Chica Pool 1 compared to Chica Pool 2. We used Hidden Markov Model (HMM) and fine-scale  
535 SNP mapping approaches to calculate ancestry proportions globally (i.e. genome-wide) and  
536 locally (at each base pair along each of the 25 chromosomes) in both Chica pools. To determine  
537 whether Pool 1 (nearer to the cave entrance) carries a higher proportion of surface ancestry  
538 compared to Pool 2 (deeper in the cave) at regions of the genome important to cave adaptation,  
539 we also asked whether regions of high divergence between pools exhibit higher differences in  
540 local ancestry.

541

542 We implemented a HMM-based approach in Loter<sup>88</sup> to infer genome-wide local ancestry in the  
543 Chica individuals. Tinaja and Río Choy served as the parental cave and surface populations,  
544 respectively, for the initial training stage of the HMM. We excluded two Tinaja samples that  
545 showed putative evidence of admixture<sup>37</sup>. This analysis allowed us to estimate global ancestry  
546 proportions and mean minor and major parent tract lengths for each individual. Ancestry tract  
547 lengths were converted from base pairs to Morgans using the median genome-wide  
548 recombination rate of median recombination rate of 1.16 cM/Mb obtained from a previously



549 published genetic map for *A. mexicanus*<sup>89</sup>. We then estimated the number of generations since  
550 the onset of admixture ( $T_{\text{admix}}$ ) in each pool using the following equation:

551

$$552 \quad T_{\text{admix}} = 1 / (L_M * p_B)$$

553

554 where  $L_M$  is the mean ancestry tract length from the minor parent in Morgans and  $p_B$  is the  
555 proportion of the genome derived from the major parent (the probability of recombining)<sup>90-92</sup>.

556

557 We next used a chromosome painting approach with ancestry-informative sites to validate the  
558 delimitation of ancestry blocks detected by the HMM and to visualize patterns of introgression  
559 across the Chica cavefish genomes. This approach provides a lower level of resolution for  
560 ancestry block delimitation but with higher power to classify regions as derived from either  
561 parental genome. We identified alleles that were differentially fixed in Río Choy and Tinaja  
562 parental populations and had no missing data using the script `get_fixed_site_gts.rb`  
563 ([https://github.com/mmatschiner/tutorials/blob/master/analysis\\_of\\_introgression\\_with\\_snp\\_data/  
564 src/get\\_fixed\\_site\\_gts.rb](https://github.com/mmatschiner/tutorials/blob/master/analysis_of_introgression_with_snp_data/src/get_fixed_site_gts.rb)). We thinned SNPs to be a minimum of 1 kb apart and mapped these  
565 ancestry-informative sites in the Chica samples using the script `plot_fixed_site_gts.rb`  
566 ([https://github.com/mmatschiner/tutorials/blob/master/analysis\\_of\\_introgression\\_with\\_snp\\_data/  
567 src/plot\\_fixed\\_site\\_gts.rb](https://github.com/mmatschiner/tutorials/blob/master/analysis_of_introgression_with_snp_data/src/plot_fixed_site_gts.rb)).

568

569

### 570 *Synthesizing patterns of genetic divergence and local ancestry*

571 To quantify and visualize patterns of divergence between Pool 1 and Pool 2, we calculated  
572 summary statistics ( $D_{xy}$ ,  $F_{st}$ ,  $\Pi$ ) in non-overlapping 50kb windows across the genome using the  
573 python script `popgenWindows.py`  
574 ([https://github.com/simonhmartin/genomics\\_general/blob/master/popgenWindows.py](https://github.com/simonhmartin/genomics_general/blob/master/popgenWindows.py)). We also

575 calculated Dxy on a site-by-site basis using a custom python script (Cave\_fish\_Dxy.py). We asked  
576 whether there was an association between differences in local ancestry between pools and  
577 absolute genetic divergence (Dxy) between pools within outlier windows (which included coding  
578 and non-coding regions) and in coding regions alone.

579  
580 We identified outlier windows as any 50kb window with a Dxy value above the 95th percentile  
581 (Dxy > 0.0035). Within each outlier window, we calculated the difference in local ancestry between  
582 fish from Pool 1 and Pool 2 at each site. We used a Wilcoxon rank sum test to identify whether  
583 ancestry differed within these regions between fish from Pool 1 versus Pool 2. We used Pearson's  
584 correlation implemented in R (v4.0.2) to test for an association between difference in local  
585 ancestry and sequence divergence (Dxy) at each site between Chica Pool 1 and Pool 2 within  
586 outlier windows.

587  
588 We calculated summary statistics for the coding region of each gene (i.e., max, median and mean  
589 Dxy, number of variant and invariant sites) within the *A. mexicanus* annotation (v101, downloaded  
590 from [ftp://ftp.ensembl.org/pub/release-101/gtf/astyanax\\_mexicanus/](ftp://ftp.ensembl.org/pub/release-101/gtf/astyanax_mexicanus/)) using a custom python  
591 script (Dxy\_Summary\_per\_gene\_ensemblGTF.py). This allowed us to rank genes by relative  
592 level of differentiation between Pool 1 and Pool 2. From this ranked list, we considered all genes  
593 with a mean Dxy above the 95th percentile (Dxy > 0.00276) as putative candidates for cave  
594 adaptation.

595  
596 We used the GO Consortium Gene Ontology Enrichment Analysis tool (<http://geneontology.org/>)  
597 to ask whether any categories of biological processes were overrepresented in our set of outlier  
598 genes. We used the human (*Homo sapiens*) reference database for this analysis (20,851 genes).  
599 Fisher's exact tests were performed to determine whether the number of genes associated with

600 a given ontology were over- or under-represented in our set of outlier genes relative to the  
601 reference database.

602  
603 We identified coding variants present among both Chica pools, Tinaja, and Río Choy and  
604 predicted the consequence of each variant on protein function using *in silico* computational  
605 analysis with the SIFT (sorting intolerant from tolerant) algorithm<sup>47</sup> and the Ensembl Variant Effect  
606 Predictor (VEP) software suite<sup>48</sup>. SIFT uses sequence homology and data on the physical  
607 properties of a given protein to predict whether an amino acid substitution will be tolerated or  
608 deleterious. VEP performs annotation and analysis of genomic variants to predict impact on the  
609 protein sequence (i.e., modifier, low, moderate, or high).

610  
611 Preliminary analyses indicated that one of our top candidate genes with high sequence  
612 divergence between Chica pools (*cry1a*) harbored a putative deleterious coding mutation  
613 (R263Q). To determine whether this variant is derived in cavefish and assess whether it occurs  
614 at evolutionarily conserved sites, we used the *Astyanax* surface fish genome annotation to obtain  
615 the CDS for *cry1a* from our population genomic data. We searched Ensembl for gene orthologs  
616 available in other animal species, including human, mouse, zebrafish, staghorn coral (*Acropora*  
617 *millepora*), thale cress (*Arabidopsis thaliana*), and three cyprinid cavefish species from China, the  
618 blind barbel (*Sinocyclocheilus anshuiensis*), the golden-line barbel (*Sinocyclocheilus grahami*),  
619 and the horned golden-line barbel (*Sinocyclocheilus rhinoceros*). We also downloaded the CDS  
620 for *cry1a* from another cyprinid cavefish species from Somalia, *Phreatichthys andruzzii*, from  
621 NCBI. We conducted a multiple species alignment for all 285 *cry1* orthologs using Muscle<sup>93</sup>. While  
622 investigating the R263Q mutation in *cry1a*, we identified a misassembly in the *Astyanax*  
623 *mexicanus* surface genome (*Astyanax\_mexicanus*-2.0, downloaded from NCBI) affecting exons  
624 9-13 of the *cry1a* coding region (*cry1a* CDS: 14,394-15,659 bp). Further investigation revealed  
625 that a portion of the coding region (*cry1a* CDS: 268-597 bp) was missing from the Pachon cavefish

626 genome assembly (*Astyanax\_mexicanus*-1.0.2, downloaded from NCBI). To confirm the mutation  
627 we identified in our population genomic data, we downloaded previously published *cry1a* mRNA  
628 sequences with complete CDS from Chica cave, Pachon cave, and Micos River (NCBI accession  
629 #s KF737846- KF737848). Aligning our population genomic data to the mRNA allowed us to verify  
630 that the correct exon coordinates were used around the mutation of interest. To visualize the  
631 location of the R263Q mutation, we created a 3D model of the *Astyanax* Pachon cavefish CRY1A  
632 protein in SWISS-MODEL<sup>94</sup> using mouse CRY1 crystal structure (PDB: 6kx7). We imported the  
633 model into VMD (version 1.9.4) for visualization. To visualize the phylogenetic relationship  
634 between lineages with the R263Q mutation and identify putative instances of convergent evolution,  
635 we constructed a species tree that included 23 animal species (subterranean lineages and their  
636 close relatives) based on the species tree available from Ensembl release 102 and<sup>55,59,60</sup>.

637  
638 To test for signatures of selection in regions of the genome containing outlier genes, we used  
639 diploS/HIC<sup>46</sup> to detect and classify selective sweeps. diploS/HIC uses a powerful supervised  
640 machine learning approach to identify windows in the genome that have undergone “soft”  
641 sweeps (selection on standing genetic variation) or “hard” sweeps (selection on new mutations)  
642 with high accuracy. We first simulated selective sweeps using discoal<sup>95</sup> and then used the  
643 simulated data to train diploS/HIC. We provided diploS/HIC with a VCF containing the 3,337,738  
644 SNPs showing <20% missing data across all populations and a masked version of the surface  
645 fish genome. We generated feature vectors for both Chica pools using the default settings of 11  
646 sub-windows across a 1,100,000 Mb region (i.e., each window was 100,000 kb). diploS/HIC ran  
647 predictions using the feature vectors to classify each window as neutral (no evidence of a  
648 selective sweep), linkedSoft (loci near a window that has undergone a soft sweep), linkedHard  
649 (loci near a window that has undergone a hard sweep), Soft (loci that have undergone a soft  
650 sweep), or Hard (loci that have undergone a hard sweep). Windows lacking sufficient SNP data  
651 to make a prediction were labeled as “NA”.

652

653 To further investigate whether outlier genes between Chica pools are associated with phenotypic  
654 differences between cavefish and surface fish, we examined differential expression between lab-  
655 raised fry from Río Choy surface populations using a recently published RNAseq data set<sup>49</sup> (SRA  
656 Project Accession #PRJNA421208). Briefly, batches of fry were sacrificed every 4 hrs between 6  
657 am and 10 pm (i.e., 0 hrs, 4 hrs, 8 hrs, 16 hrs, 20 hrs; sample size mean  $\pm$  SE across time points:  
658  $n_{\text{Choy}} = 5.33 \pm 0.33$ ,  $n_{\text{Tinaja}} = 5.83 \pm 0.17$ ) at 30 days post-fertilization (dpf) for whole-body RNA  
659 extraction and sequencing<sup>49</sup>. Read counts for each gene across each sample were calculated as  
660 described in <sup>49</sup>. We used DESeq2<sup>96</sup> to calculate Log<sub>2</sub>(cavefish/surface fish) values. We  
661 considered genes to be differentially expressed if they had a Benjamini–Hochberg adjusted p-  
662 value < 0.05. Gene will less than 100 counts across all samples were excluded from the analyses.

663

#### 664 *Fish collection and maintenance for phenotyping*

665 We phenotyped wild-caught fish from Pools 1 and 2 within Chica cave and from two other cave  
666 populations, Pachón and Los Sabinos, which served as controls. Adult fish were collected from  
667 in 2015, during the dry season. The fish used in these analyses were the same fish that were  
668 sampled in 2015 for genomic sequencing analyses. The fish were transported and housed in the  
669 aquatic facility at Universidad Autónoma de Querétaro in 24 hour constant darkness. Fish were  
670 fed 1-2 times daily with dry flakes and kept at 23°C. These conditions were maintained throughout  
671 housing and experimental conditions for consistency. All fish were inspected for overall health,  
672 and any exhibiting signs of health or stress issues were excluded from experimental tests. All the  
673 samples were collected under the auspices of the permit SGPA/DGV/S/0266/15, delivered by  
674 SEMARNAT. After the completion of behavioral assays, fin clips were collected from all Chica  
675 individuals for use in genomic sequencing as described above.

676

#### 677 *Sleep behavior phenotyping*

678 Fish were maintained in the lab for 8 months prior to behavioral assays. Adult fish were recorded  
679 in standard conditions in 10L tanks with custom-designed partitions that allowed for five fish  
680 (2L/fish) to be individually housed in each tank as previously described<sup>39</sup>. Recording chambers  
681 were illuminated with custom-designed IR LED source (Infrared 850 nm 5050 LED Strip Light,  
682 Environmental Lights). After a 4–5 day acclimation period, behavior was recorded for 24 hr  
683 beginning ZT0-ZT2. Videos were recorded at 15 frames/sec using a USB webcam (LifeCam  
684 Studio 1080 p HD Webcam, Microsoft) fitted with a zoom lens (Zoom 7000, Navitar). An IR high-  
685 pass filter (Edmund Optics Worldwide) was placed between the camera and the lens to block  
686 visible light. Videos were recorded using Virtualdub, a video-capturing software (Version 1.10.4)  
687 and were subsequently processed using Ethovision XT 9.0 (Noldus, IT). Water temperature and  
688 chemistry were monitored throughout recordings, and maintained at standard conditions in all  
689 cases. Ethovision tracking was set up as previously described<sup>39</sup>. Data was processed using Perl  
690 scripts (v5.22.0, developed on-site) and Excel macro (Microsoft)<sup>39</sup>. These data were used to  
691 calculate sleep information by finding bouts of immobility of 60 s and greater, which are highly  
692 correlated with increased arousal threshold, one of the hallmarks of sleep<sup>39</sup>.

693

#### 694 *Morphological Characterization*

695 Melanophores were quantified from bright-field images captured from each side of the body.  
696 Areas were chosen based on previous literature<sup>97</sup> (i.e., caudal fin area, adipose fin area, dorsal  
697 area, eye cup area, anal fin area, infra-orbital area; see Extended Data Figure 1). Briefly, images  
698 were loaded into Fiji ImageJ (v. 1.7, National Institutes of Health, Bethesda, MD). Images were  
699 color inverted in the selected area and using a preset noise tolerance allowed for melanophores  
700 to be automatically quantified by using pixel light intensity. If any melanophores were not counted,  
701 they were then manually added. Each image was analyzed by two different researchers to assure  
702 no significant discrepancies in quantifying, and the population of origin was blind to the

703 researchers. All final quantifications were corrected to body length to account for different sized  
704 fish.

705  
706 Eye presence and size were determined from images acquired on a handheld digital microscope  
707 (Dinoscope Pro AM4111T). Images were analyzed in Fiji ImageJ. Each image was inspected for  
708 the presence of an eye by two investigators, and the population of origin was blind to the  
709 researchers. Eye size was calculated in ImageJ by creating an ROI for the eye diameter and  
710 dividing this number by the length of the body to correct for overall size differences.

711

712

713

#### 714 **Acknowledgements**

715 We thank the University of Minnesota Genomics Center for their guidance and performing the  
716 cDNA library preparations and Illumina HiSeq 2500 sequencing. The Minnesota  
717 Supercomputing Institute (MSI) at the University of Minnesota provided resources that  
718 contributed to the research results reported within this paper. Funding was supported by NIH  
719 (1R01GM127872-01 to SEM, ACK, and NR) and NSF award IOS 165674 to ACK, and a US-  
720 Israel BSF award to ACK, and NSF IOS-1933076 to JK, SEM, and NR. Fish were collected  
721 under CONAPESCA permit PPF/DGOPA - 106 / 2013 to Claudia Patricia Ornelas García and  
722 SEMARNAT permit 02241 to Ernesto Maldonado. We thank the Mexican government for  
723 providing the collecting permit to R.B. in 2008 (DGOPA.00570.288108-0291).

724

725

#### 726 **References Cited**

727 1. Lenormand, T. Gene flow and the limits to natural selection. *Trends in Ecology and*  
728 *Evolution* (2002). doi:10.1016/S0169-5347(02)02497-7

- 729 2. Marques, D. A. *et al.* Genomics of Rapid Incipient Speciation in Sympatric Threespine  
730 Stickleback. *PLoS Genet.* **12**, 1–34 (2016).
- 731 3. Hoekstra, H. E., Krenz, J. G. & Nachman, M. W. Local adaptation in the rock pocket  
732 mouse (*Chaetodipus intermedius*): natural selection and phylogenetic history of  
733 populations. *Heredity (Edinb)*. **94**, 217–228 (2005).
- 734 4. Fitzpatrick, S. W. *et al.* Gene Flow Constrains and Facilitates Genetically Based  
735 Divergence in Quantitative Traits. *Copeia* (2017). doi:10.1643/C1-16-559
- 736 5. Suarez-Gonzalez, A., Lexer, C. & Cronk, Q. C. B. Adaptive introgression: A plant  
737 perspective. *Biol. Lett.* (2018). doi:10.1098/rsbl.2017.0688
- 738 6. Hedrick, P. W. Adaptive introgression in animals: Examples and comparison to new  
739 mutation and standing variation as sources of adaptive variation. *Molecular Ecology*  
740 (2013). doi:10.1111/mec.12415
- 741 7. Racimo, F., Sankararaman, S., Nielsen, R. & Huerta-Sánchez, E. Evidence for archaic  
742 adaptive introgression in humans. *Nature Reviews Genetics* (2015). doi:10.1038/nrg3936
- 743 8. Samuk, K. *et al.* Gene flow and selection interact to promote adaptive divergence in  
744 regions of low recombination. *Mol. Ecol.* (2017). doi:10.1111/mec.14226
- 745 9. Mitchell, R. W., Russell, W. H. & Elliott, W. R. *Mexican eyeless characin fishes, genus*  
746 *Astyanax: environment, distribution, and evolution*. (Texas Tech Press, 1977).
- 747 10. Mallet, J. Hybridization as an invasion of the genome. *Trends Ecol. Evol.* **20**, 229–237  
748 (2005).
- 749 11. Abbott, R. *et al.* Hybridization and speciation. *J. Evol. Biol.* **26**, 229–246 (2013).
- 750 12. Taylor, S. A. & Larson, E. L. Insights from genomes into the evolutionary importance and  
751 prevalence of hybridization in nature. *Nature Ecology and Evolution* (2019).  
752 doi:10.1038/s41559-018-0777-y
- 753 13. Buerkle, C. A. & Lexer, C. Admixture as the basis for genetic mapping. *Trends Ecol. Evol.*  
754 **23**, 686–694 (2008).



- 755 14. Crawford, J. E. & Nielsen, R. Detecting adaptive trait loci in nonmodel systems:  
756 divergence or admixture mapping? *Mol. Ecol.* **22**, 6131–6148 (2013).
- 757 15. Chakraborty, R. & Weiss, K. M. Admixture as a tool for finding linked genes and detecting  
758 that difference from allelic association between loci. *Proc. Natl. Acad. Sci. U. S. A.*  
759 (1988). doi:10.1073/pnas.85.23.9119
- 760 16. Risch, N. Mapping genes for complex diseases using association studies with recently  
761 admixed populations. *Am J Hum Genet Suppl* **51**, 13 (1992).
- 762 17. Rieseberg, L. H., Whitton, J. & Gardner, K. Hybrid zones and the genetic architecture of a  
763 barrier to gene flow between two sunflower species. *Genetics* **152**, 713–727 (1999).
- 764 18. Luttikhuisen, P. C., Drent, J., Peijnenburg, K. T. C. A., Van Der Veer, H. W. &  
765 Johannesson, K. Genetic architecture in a marine hybrid zone: Comparing outlier  
766 detection and genomic clines analysis in the bivalve *Macoma balthica*. *Mol. Ecol.* (2012).  
767 doi:10.1111/j.1365-294X.2012.05586.x
- 768 19. Malek, T. B., Boughman, J. W., Dworkin, I. & Peichel, C. L. Admixture mapping of male  
769 nuptial colour and body shape in a recently formed hybrid population of threespine  
770 stickleback. *Mol. Ecol.* (2012). doi:10.1111/j.1365-294X.2012.05660.x
- 771 20. vonHoldt, B. M., Kays, R., Pollinger, J. P. & Wayne, R. K. Admixture mapping identifies  
772 introgressed genomic regions in North American canids. *Mol. Ecol.* (2016).  
773 doi:10.1111/mec.13667
- 774 21. Brelsford, A., Toews, D. P. L. & Irwin, D. E. Admixture mapping in a hybrid zone reveals  
775 loci associated with avian feather coloration. *Proc. R. Soc. B Biol. Sci.* (2017).  
776 doi:10.1098/rspb.2017.1106
- 777 22. Bresadola, L. *et al.* Admixture mapping in interspecific *Populus* hybrids identifies classes  
778 of genomic architectures for phytochemical, morphological and growth traits. *New Phytol.*  
779 (2019). doi:10.1111/nph.15930
- 780 23. Calfee, E., Agra, M. N., Palacio, M. A., Ramírez, S. R. & Coop, G. Selection and

- 781 hybridization shaped the rapid spread of African honey bee ancestry in the americas.  
782 *PLoS Genet.* (2020). doi:10.1371/journal.pgen.1009038
- 783 24. Powell, D. L. *et al.* Natural hybridization reveals incompatible alleles that cause  
784 melanoma in swordtail fish. *Science (80-. )*. (2020). doi:10.1126/science.aba5216
- 785 25. Gompert, Z., Mandeville, E. G. & Buerkle, C. A. Analysis of Population Genomic Data  
786 from Hybrid Zones. *Annu. Rev. Ecol. Evol. Syst.* (2017). doi:10.1146/annurev-ecolsys-  
787 110316-022652
- 788 26. Ravinet, M. *et al.* Interpreting the genomic landscape of speciation: a road map for finding  
789 barriers to gene flow. *J. Evol. Biol.* **30**, 1450–1477 (2017).
- 790 27. Kowalko, J. E. *et al.* Loss of schooling behavior in cavefish through sight-dependent and  
791 sight-independent mechanisms. *Curr. Biol.* **23**, 1874–1883 (2013).
- 792 28. Yoshizawa, M., Gorički, Š., Soares, D. & Jeffery, W. R. Evolution of a behavioral shift  
793 mediated by superficial neuromasts helps cavefish find food in darkness. *Curr. Biol.* **20**,  
794 1631–1636 (2010).
- 795 29. Duboué, E. R., Keene, A. C. & Borowsky, R. L. Evolutionary convergence on sleep loss  
796 in cavefish populations. *Curr. Biol.* (2011). doi:10.1016/j.cub.2011.03.020
- 797 30. Bibliowicz, J. *et al.* Differences in chemosensory response between eyed and eyeless  
798 *Astyanax mexicanus* of the Rio Subterráneo cave. *Evodevo* (2013). doi:10.1186/2041-  
799 9139-4-25
- 800 31. Aspirasa, A. C., Rohnera, N., Martineau, B., Borowsky, R. L. & Tabina, C. J.  
801 Melanocortin 4 receptor mutations contribute to the adaptation of cavefish to nutrient-poor  
802 conditions. *Proc. Natl. Acad. Sci. U. S. A.* **112**, 9668–9673 (2015).
- 803 32. Espinasa, L. *et al.* Discovery of two new *astyanax* cavefish localities leads to further  
804 understanding of the species biogeography. *Diversity* (2020). doi:10.3390/d12100368
- 805 33. Ornelas-García, C. P., Domínguez-Domínguez, O. & Doadrio, I. Evolutionary history of  
806 the fish genus *astyanax* baird & Girard (1854) (Actinopterygii, Characidae) in

- 807 mesoamerica reveals multiple morphological homoplasies. *BMC Evol. Biol.* (2008).  
808 doi:10.1186/1471-2148-8-340
- 809 34. Bradic, M., Beerli, P., García-de León, F. J., Esquivel-Bobadilla, S. & Borowsky, R. L.  
810 Gene flow and population structure in the Mexican blind cavefish complex (*Astyanax*  
811 *mexicanus*). *BMC Evol. Biol.* **12**, 9 (2012).
- 812 35. Strecker, U., Hausdorf, B. & Wilkens, H. Parallel speciation in *Astyanax* cave fish  
813 (Teleostei) in Northern Mexico. *Mol. Phylogenet. Evol.* **62**, 62–70 (2012).
- 814 36. Coghill, L. M., Darrin Hulsey, C., Chaves-Campos, J., García de Leon, F. J. & Johnson,  
815 S. G. Next generation phylogeography of cave and surface *Astyanax mexicanus*. *Mol.*  
816 *Phylogenet. Evol.* **79**, 368–374 (2014).
- 817 37. Herman, A. *et al.* The role of gene flow in rapid and repeated evolution of cave-related  
818 traits in Mexican tetra, *Astyanax mexicanus*. *Mol. Ecol.* (2018). doi:10.1111/mec.14877
- 819 38. Moran, D., Softley, R. & Warrant, E. J. Eyeless Mexican Cavefish Save Energy by  
820 Eliminating the Circadian Rhythm in Metabolism. *PLoS One* **9**, e107877 (2014).
- 821 39. Yoshizawa, M. *et al.* Distinct genetic architecture underlies the emergence of sleep loss  
822 and prey-seeking behavior in the Mexican cavefish. *BMC Biol.* (2015).  
823 doi:10.1186/s12915-015-0119-3
- 824 40. Romero, A. Introgressive hybridization in the *Astyanax fasciatus* (Pisces: Characidae)  
825 population at La Cueva Chica. *NSS Bull.* (1983).
- 826 41. Breder, C. M. Descriptive ecology of La Cueva Chica, with especial reference to the blind  
827 fish, *Anoptichthys*. *Zoologica* **27**, 7–16 (1942).
- 828 42. Bridges, W. The blind fish of La cueva Chica. *Bull. New York Zool. Soc* **43**, 74–97 (1940).
- 829 43. Elliott, W. R. Cave Biodiversity and Ecology of the Sierra de El Abra Region. in *Biology*  
830 *and Evolution of the Mexican Cavefish* 59–76 (Elsevier, 2015). doi:10.1016/B978-0-12-  
831 802148-4.00003-7
- 832 44. Şadoğlu, P. A mendelian gene for albinism in natural cave fish. *Experientia* (1957).

- 833 doi:10.1007/BF02161111
- 834 45. Wilkens, H. Evolution and Genetics of Epigeal and Cave Astyanax fasciatus  
835 (Characidae, Pisces). in *Evolutionary Biology* (1988). doi:10.1007/978-1-4613-1043-3\_8
- 836 46. Kern, A. D. & Schrider, D. R. DiploS/HIC: An updated approach to classifying selective  
837 sweeps. *G3 Genes, Genomes, Genet.* (2018). doi:10.1534/g3.118.200262
- 838 47. Kumar, P., Henikoff, S. & Ng, P. C. Predicting the effects of coding non-synonymous  
839 variants on protein function using the SIFT algorithm. *Nat. Protoc.* (2009).  
840 doi:10.1038/nprot.2009.86
- 841 48. McLaren, W. *et al.* The Ensembl Variant Effect Predictor. *Genome Biol.* (2016).  
842 doi:10.1186/s13059-016-0974-4
- 843 49. McGaugh, S. E., Passow, C. N., Jaggard, J. B., Stahl, B. A. & Keene, A. C. Unique  
844 transcriptional signatures of sleep loss across independently evolved cavefish  
845 populations. *J. Exp. Zool. Part B Mol. Dev. Evol.* (2020). doi:10.1002/jez.b.22949
- 846 50. Cashmore, A. R., Jarillo, J. A., Wu, Y. J. & Liu, D. Cryptochromes: blue light receptors for  
847 plants and animals. *Science (80-. ).* **284**, 760–765 (1999).
- 848 51. Hirayama, J. *et al.* The clock components Period2, Cryptochrome1a, and  
849 Cryptochrome2a function in establishing light-dependent behavioral rhythms and/or total  
850 activity levels in zebrafish. *Sci. Rep.* (2019). doi:10.1038/s41598-018-37879-8
- 851 52. Patke, A. *et al.* Mutation of the Human Circadian Clock Gene CRY1 in Familial Delayed  
852 Sleep Phase Disorder. *Cell* **169**, 203-215.e13 (2017).
- 853 53. Ceinos, R. M. *et al.* Mutations in blind cavefish target the light-regulated circadian clock  
854 gene, period 2. *Sci. Rep.* (2018). doi:10.1038/s41598-018-27080-2
- 855 54. Cavallari, N. *et al.* A blind circadian clock in cavefish reveals that opsins mediate  
856 peripheral clock photoreception. *PLoS Biol.* (2011). doi:10.1371/journal.pbio.1001142
- 857 55. Yang, J. *et al.* The Sinocyclocheilus cavefish genome provides insights into cave  
858 adaptation. *BMC Biol.* **14**, 1 (2016).

- 859 56. Riccio, A. P. & Goldman, B. D. Circadian rhythms of locomotor activity in naked mole-rats  
860 (Heterocephalus glaber). *Physiol. Behav.* **71**, 1–13 (2000).
- 861 57. Czarna, A. *et al.* XStructures of drosophila cryptochrome and mouse cryptochrome1  
862 provide insight into circadian function. *Cell* (2013). doi:10.1016/j.cell.2013.05.011
- 863 58. Beale, A. *et al.* Circadian rhythms in Mexican blind cavefish *Astyanax mexicanus* in the  
864 lab and in the field. *Nat. Commun.* (2013). doi:10.1038/ncomms3769
- 865 59. Colli, L., Paglianti, A., Berti, R., Gandolfi, G. & Tagliavini, J. Molecular phylogeny of the  
866 blind cavefish *Phreatichthys andruzzii* and *Garra barreimiae* within the family Cyprinidae.  
867 *Environ. Biol. Fishes* **84**, 95–107 (2009).
- 868 60. Patterson, B. D. & Upham, N. S. A newly recognized family from the Horn of Africa, the  
869 Heterocephalidae (Rodentia: Ctenohystrica). *Zool. J. Linn. Soc.* **172**, 942–963 (2014).
- 870 61. Jaggard, J. *et al.* The lateral line confers evolutionarily derived sleep loss in the Mexican  
871 cavefish. *J. Exp. Biol.* **220**, 284–293 (2017).
- 872 62. Lamichhaney, S. *et al.* Rapid hybrid speciation in Darwin’s Finches. *Science* (80-. ).  
873 (2018). doi:10.1126/science.aao4593
- 874 63. Bergman, T. J., Phillips-Conroy, J. E. & Jolly, C. J. Behavioral variation and reproductive  
875 success of male baboons (*Papio anubis* x *papio hamadryas*) in a hybrid social group. *Am.*  
876 *J. Primatol.* (2008). doi:10.1002/ajp.20467
- 877 64. Ackermann, R. R. *et al.* Hybridization in human evolution: Insights from other organisms.  
878 *Evolutionary Anthropology* (2019). doi:10.1002/evan.21787
- 879 65. Ackermann, R. R., Mackay, A. & Arnold, M. L. The Hybrid Origin of “Modern” Humans.  
880 *Evol. Biol.* (2016). doi:10.1007/s11692-015-9348-1
- 881 66. Dowling, T. E., Martasian, D. P. & Jeffery, W. R. Evidence for multiple genetic forms with  
882 similar eyeless phenotypes in the blind cavefish, *Astyanax mexicanus*. *Mol. Biol. Evol.* **19**,  
883 446–455 (2002).
- 884 67. Avise, J. C. & Selander, R. K. Evolutionary genetics of cave-dwelling fishes of the genus

- 885 Astyanax. *Evolution* (N. Y). 1–19 (1972).
- 886 68. Fitzpatrick, M. J. *et al.* Candidate genes for behavioural ecology. *Trends in Ecology and*  
887 *Evolution* (2005). doi:10.1016/j.tree.2004.11.017
- 888 69. Niepoth, N. & Bendesky, A. How Natural Genetic Variation Shapes Behavior. *Annu. Rev.*  
889 *Genomics Hum. Genet.* **21**, (2020).
- 890 70. Hoban, S. *et al.* Finding the genomic basis of local adaptation: pitfalls, practical solutions,  
891 and future directions. *Am. Nat.* **188**, 379–397 (2016).
- 892 71. Tigano, A. & Friesen, V. L. Genomics of local adaptation with gene flow. *Mol. Ecol.* **25**,  
893 2144–2164 (2016).
- 894 72. McKenna, A. *et al.* The Genome Analysis Toolkit: a MapReduce framework for analyzing  
895 next-generation DNA sequencing data. *Genome Res.* **20**, 1297–1303 (2010).
- 896 73. Depristo, M. A. *et al.* A framework for variation discovery and genotyping using next-  
897 generation DNA sequencing data. *Nat. Genet.* (2011). doi:10.1038/ng.806
- 898 74. Van der Auwera, G. A. *et al.* From FastQ Data to High-Confidence Variant Calls: The  
899 Genome Analysis Toolkit Best Practices Pipeline. *Curr. Protoc. Bioinforma.* **43**, 11.10.1–  
900 11.10.33 (2013).
- 901 75. Li, H. & Durbin, R. Fast and accurate short read alignment with Burrows-Wheeler  
902 transform. *Bioinformatics* **25**, 1754–1760 (2009).
- 903 76. Li, H. *et al.* The Sequence Alignment/Map format and SAMtools. *Bioinformatics* **25**,  
904 2078–2079 (2009).
- 905 77. Danecek, P. *et al.* The variant call format and VCFtools. *Bioinformatics* **27**, 2156–2158  
906 (2011).
- 907 78. McGaugh, S. E. S. *et al.* The cavefish genome reveals candidate genes for eye loss. *Nat.*  
908 *Commun.* (2014). doi:10.1038/ncomms6307
- 909 79. Pickrell, J. & Pritchard, J. Inference of population splits and mixtures from genome-wide  
910 allele frequency data. *Nat. Preced.* **1** (2012).

- 911 80. Card, D. *RADpipe*. (GitHub repository, 2015). doi:10.5281/zenodo.17809
- 912 81. Malinsky, M. Dsuite-fast D-statistics and related admixture evidence from VCF files.  
913 *BioRxiv* **634477**, (2019).
- 914 82. Green, R. E. *et al.* A draft sequence of the Neandertal genome. *Science* (80-. ). **328**,  
915 710–722 (2010).
- 916 83. Hohenlohe, P. A., Bassham, S., Currey, M. & Cresko, W. A. Extensive linkage  
917 disequilibrium and parallel adaptive divergence across threespine stickleback genomes.  
918 *Philos. Trans. R. Soc. B Biol. Sci.* **367**, 395–409 (2012).
- 919 84. Wang, J., Street, N. R., Scofield, D. G. & Ingvarsson, P. K. Variation in Linked Selection  
920 and Recombination Drive Genomic Divergence during Allopatric Speciation of European  
921 and American Aspens. *Mol. Biol. Evol.* **33**, 1754–1767 (2016).
- 922 85. Schumer, M. *et al.* Natural selection interacts with recombination to shape the evolution  
923 of hybrid genomes. *Science* (80-. ). **360**, 656–660 (2018).
- 924 86. Janzen, T., Nolte, A. W. & Traulsen, A. The breakdown of genomic ancestry blocks in  
925 hybrid lineages given a finite number of recombination sites. *Evolution* (N. Y). (2018).  
926 doi:10.1111/evo.13436
- 927 87. Leitwein, M. *et al.* The role of recombination on genome-wide patterns of local ancestry  
928 exemplified by supplemented brook charr populations. *Mol. Ecol.* (2019).  
929 doi:10.1111/mec.15256
- 930 88. Dias-Alves, T., Mairal, J. & Blum, M. G. B. Loter: A software package to infer local  
931 ancestry for a wide range of species. *Mol. Biol. Evol.* (2018). doi:10.1093/molbev/msy126
- 932 89. O'Quin, K. E., Yoshizawa, M., Doshi, P. & Jeffery, W. R. Quantitative Genetic Analysis of  
933 Retinal Degeneration in the Blind Cavefish *Astyanax mexicanus*. *PLoS One* **8**, (2013).
- 934 90. Gravel, S. Population genetics models of local ancestry. *Genetics* **191**, 607–619 (2012).
- 935 91. Jin, W., Li, R., Zhou, Y., Genetics, S. X.-E. J. of H. & 2014, undefined. Distribution of  
936 ancestral chromosomal segments in admixed genomes and its implications for inferring

- 937 population history and admixture mapping. *nature.com*
- 938 92. Schumer, M., Cui, R., Powell, D. L., Rosenthal, G. G. & Andolfatto, P. Ancient  
939 hybridization and genomic stabilization in a swordtail fish. *Mol. Ecol.* **25**, 2661–2679  
940 (2016).
- 941 93. Edgar, R. C. MUSCLE: A multiple sequence alignment method with reduced time and  
942 space complexity. *BMC Bioinformatics* **32**, 1792–1797 (2004).
- 943 94. Waterhouse, A. *et al.* SWISS-MODEL: Homology modelling of protein structures and  
944 complexes. *Nucleic Acids Res.* (2018). doi:10.1093/nar/gky427
- 945 95. Kern, A. D. & Schrider, D. R. Discoal: Flexible coalescent simulations with selection.  
946 *Bioinformatics* (2016). doi:10.1093/bioinformatics/btw556
- 947 96. Love, M. I., Huber, W. & Anders, S. Moderated estimation of fold change and dispersion  
948 for RNA-seq data with DESeq2. *Genome Biol.* **15**, (2014).
- 949 97. Stahl, B. A., Sears, C. R., Ma, L., Perkins, M. & Gross, J. B. Pmela and Tyrp1b contribute  
950 to melanophore variation in Mexican Cavefish. in *Origin and Evolution of Biodiversity*  
951 (2018). doi:10.1007/978-3-319-95954-2\_1
- 952
- 953
- 954
- 955
- 956
- 957
- 958
- 959
- 960
- 961
- 962



963  
964  
965  
966  
967  
968  
969  
970

971 **Supplementary Information**

972 *Sequencing and Genotyping*

973 Sequencing resulted in a mean  $\pm$  SE of 187,777,319  $\pm$  3,047,876 reads per individual for the 19  
974 Chica samples and 331,445,356  $\pm$  248,640,606 reads per individual for the three Los Sabinos  
975 samples. After quality filtering and mapping, all 60 samples had a mean  $\pm$  SE genome-wide depth  
976 of coverage of 10.50  $\pm$  0.53X (Extended Data Table 2).

977

978 *Population Structure*

979 We examined population genetic structure among populations of cave and surface fish using PCA  
980 and ADMIXTURE. Populations examined (i.e., Río Choy, Los Sabinos, Tinaja, Rascón, Pachón,  
981 and Chica) generally showed separation from one another into distinct genetic clusters in both  
982 PCA and ADMIXTURE analyses (Figure 2A,B; Extended Data Figure 2). The first three principal  
983 components from the PCA explained over 45% of the total variance in the data (Extended Data  
984 Figures 2,3; Extended Data Table 3), and separated the populations based on lineage and  
985 ecotype (surface or cave). For the ADMIXTURE analysis, comparison of cross validation error for  
986 K=2-9 indicated an optimal K of 5 (Extended Data Figure 4). Fish from Pool 1 and Pool 2 within  
987 Chica cave clustered together in the ADMIXTURE analysis and samples from both pools overlap  
988 completely in the PCA, indicating low overall levels of genetic divergence between the pools

989 (Extended Data Figure 5). Los Sabinos and Tinaja are neighboring caves in the El Abra region  
990 and individuals from these clustered together in both analyses (Figure 2A,B; Extended Data  
991 Figure 2).

992  
993 Average nucleotide diversity ( $P_i$ ) across the genome did not differ between pools within Chica  
994 cave ( $P_i = 0.0021$  for Chica Pool 1 and Pool 2; Extended Data Table 4). Notably, nucleotide  
995 diversity within Chica cave was 2-3X higher compared to other caves (Extended Data Table 4)  
996 and absolute genetic divergence between pools within Chica cave ( $D_{xy} = 0.0020$ ) is comparable  
997 to that observed among other cave populations (Extended Data Table 5). Despite the fact that we  
998 observed no sites differentially fixed between Chica Pool1 and Pool 2, indicative that gene flow is  
999 ongoing, we observed several peaks of high sequence divergence between pools (Fig. 2E).

1000

#### 1001 *Genome-wide tests for introgression*

1002 The results of two independent tests for introgression (implemented in Treemix and Dsuite)  
1003 indicated hybridization between Chica cavefish and the nearby surface and cave lineages.  
1004 Treemix first builds a bifurcating population tree and then fits for migration “edges” between  
1005 branches. We chose the optimal number of migration events between populations in Treemix by  
1006 examining the variance explained by models with zero through five migrations allowed. Adding  
1007 one migration increased the proportion of variance explained from 0.59 to 0.92. The variance  
1008 explained reached 1 and plateaued at three migration events (Extended Data Figure 6).  
1009 Phylogenetic relationships were as expected based on previous analyses<sup>37</sup>. Río Choy (new  
1010 lineage) grouped with *A. aeneus*, and Rascón, Tinaja, and Chica (all old lineage) grouped  
1011 together. We observed evidence of migration events between Río Choy surface fish with Chica  
1012 cavefish and also between Tinaja cavefish and Chica cavefish (Figure 2C).

1013

1014 The results of the D statistic and f4 ratio tests implemented in Dsuite also confirmed introgression  
1015 between Chica and Tinaja and between Chica and Río Choy. We were particularly interested in  
1016 asking whether Chica has experienced recent gene flow with the local surface population, Río  
1017 Choy. We observed that Río Choy and Chica share more derived sites (BBAA) than Chica and  
1018 Rascón (ABBA) (Extended Data Table 6). Because Chica and Rascón populations are both  
1019 derived from old lineage surface stock of *A. mexicanus*, whereas Río Choy is derived from new  
1020 lineage surface stock, this pattern is indicative of introgression. Positive f4 ratios were also  
1021 observed in all possible trios between Río Choy, Chica, Rascón, and Tinaja, indicative of  
1022 introgression (Extended Data Table 6). Thus, our analyses support that Chica was originally  
1023 colonized from an old lineage stock, but has subsequently experienced substantial introgression  
1024 with new lineage surface populations.

1025

#### 1026 *Local Ancestry Inference*

1027 To characterize patterns of introgression in Chica cavefish genomes, we used HMM-based  
1028 ancestry inference and SNP mapping at ancestry-informative sites. The HMM-based approach  
1029 implemented in Loter revealed that the genomes of individuals from Chica cave were composed  
1030 of approximately 75% cavefish (i.e. Tinaja) ancestry and 25% surface fish (i.e. Río Choy) ancestry  
1031 (Extended Data Figure 6). The two pools within Chica cave exhibited nearly identical global  
1032 ancestry proportions corresponding to surface (Pool 1 Surface Ancestry: Mean  $\pm$  SE =  
1033 0.245 $\pm$ 0.004; Pool 2 Surface Ancestry: Mean  $\pm$  SE = 0.244 $\pm$ 0.003) versus cave (Pool 1 Cave  
1034 Ancestry: Mean  $\pm$  SE = 0.755 $\pm$ 0.004; Pool 2 Cave Ancestry: Mean  $\pm$  SE = 0.756 $\pm$ 0.003) parental  
1035 populations. Surface ancestry tract length distribution was similar in both Chica pools (Extended  
1036 Data Table 7). The timing since the onset of admixture also did not differ between pools (Mean  $\pm$   
1037 SE generations since hybridization: Pool 1 = 2315 $\pm$ 19, Pool 2 = 2294 $\pm$ 17) (Extended Data Table  
1038 8).

1039

1040 We identified 89,810 sites with complete fixation of different alleles in the parental populations  
1041 (i.e., Río Choy and Tinaja). We mapped these sites across all 25 diploid chromosomes for each  
1042 of the 19 Chica fish. In general, ancestry was highly admixed across Chica genomes and showed  
1043 a pattern in agreement with the findings of the HMM-based ancestry inference (Fig. 2D; Extended  
1044 Data Figure 7).

1045

#### 1046 *Gene Expression*

1047 To investigate whether outlier genes may play a functional role in generating phenotypic variation  
1048 associated with local adaptation, we examined differences in gene expression between lab-reared  
1049 fry from Río Choy surface and Tinaja cave populations at multiple time points<sup>49</sup>. Out of a total set  
1050 of 27,420 genes, 18,958 were expressed in fry at 30 dpf, and 11,901 (63%) of expressed genes  
1051 showed significant differential expression (Benjamini–Hochberg adjusted p-value < 0.05) between  
1052 cave and surface fish during at least one time point (Extended Data Tables 12-13). For the subset  
1053 of 706 genes in the top 5 % of Dxy values between Chica Pool 1 and Pool 2, 586 were expressed  
1054 in fry at 30 dpf, and 389 (66%) of expressed genes showed significant differential expression  
1055 between cave and surface fish during at least one time point (Extended Data Tables 12-13). This  
1056 represents an enrichment of differentially expressed genes in the outlier genes compared to the  
1057 entire genome-wide data set ( $\chi^2$  square test:  $\chi^2_{1,19,544} = 3.168$ ,  $p = 0.031$ ). Out of 26 top Dxy genes  
1058 with ontologies related to cave adapted phenotypes (i.e., sleep/circadian cycle, light detection,  
1059 eye size/morphology, metabolism, pigmentation), 21 were expressed at 30 dpf. Of those 21  
1060 genes, 14 (67%) showed significant differential expression between cave and surface fish during  
1061 at least one time point (Extended Data Table 13).

1062

#### 1063 *Phenotyping*

1064 The pattern we documented of more surface-like phenotypes near the entrance of the cave (in  
1065 Pool 1) and more cave-like phenotypes deeper in the cave (in Pool 2) (Fig. 1C,D; Fig. 4) contrasts

1066 the findings of previous studies. Over eight decades ago, <sup>42</sup> and <sup>41</sup> documented more cave-like  
1067 phenotypes in the front of the cave (Pool 1) and more surface-like fish deeper in the cave (Pools  
1068 2-4). It was speculated that both cavefish and surface fish from nearby populations were entering  
1069 Chica cave subterraneously near the lower pools, and that the connection between Pool 1 and  
1070 Pools 2-4 was dynamic. A lack of connectivity between Pool 1 and the other pools was  
1071 hypothesized to create a harsher, low nutrient environment towards the front of the cave, resulting  
1072 in increased survival of fish with cave adapted phenotypes in this pool. However, <sup>43</sup> recently  
1073 suggested that surface fish may have access to the entrance of the cave via runoff from nearby  
1074 drainages. Indeed, river-dwelling fish species (i.e., cichlids and poecilids) were observed near the  
1075 entrance of the cave in Pool 1 when fish were collected for the present study in 2015. This  
1076 suggests that surface fish may have access to Chica cave Pool 1 directly via the entrance and  
1077 also via a deeper, subterraneous connection. Future studies using mark-recapture would provide  
1078 a more definitive answer.

1079

1080

1081

1082

1083

1084

1085

1086

1087

1088

1089

1090

1091

1092

1093

1094

1095

1096

1097

1098

1099

1100 **Extended Data Tables**

1101

1102 **Extended Data Table 1.** GATK filters applied to variant and invariant sites.

| <b>Invariant sites</b> | <b>SNPs</b>            | <b>Mixed/indels</b>    |
|------------------------|------------------------|------------------------|
| QD < 2.0               | QD < 2.0               | QD < 2.0               |
| FS > 60.0              | FS > 200.0             | FS > 200.0             |
| MQ < 40.0              | ReadPosRankSum < -20.0 | ReadPosRankSum < -20.0 |

1103

1104

1105

1106

1107

1108

1109

1110

1111

1112

1113

1114

1115

1116

1117

1118

1119

1120

1121

1122 **Extended Data Table 2.** Read counts and coverage info.

1123 [https://docs.google.com/spreadsheets/d/1\\_3eFqa2BuOZWYVwU9J1\\_vDAEt9D3s4ySBtOFSUo](https://docs.google.com/spreadsheets/d/1_3eFqa2BuOZWYVwU9J1_vDAEt9D3s4ySBtOFSUo)

1124 [w3Ek/edit#gid=0](#)

1125

1126

1127

1128

1129

1130

1131

1132

1133

1134

1135

1136

1137

1138

1139

1140

1141

1142

1143

1144

1145

1146

1147

1148 **Extended Data Table 3.** Eigenvalues for PC 1-20 from PCA containing all six *Astyanax*

1149 populations (i.e., Chica, Río Choy, Los Sabinos, Pachón, Rascón, and Tinaja).

| <b>PC</b> | <b>EigenValue</b> |
|-----------|-------------------|
| 1         | 3.49399           |
| 2         | 2.69367           |
| 3         | 2.48907           |
| 4         | 1.45645           |
| 5         | 1.17887           |
| 6         | 0.800319          |
| 7         | 0.796332          |
| 8         | 0.795117          |
| 9         | 0.789957          |
| 10        | 0.786389          |
| 11        | 0.764248          |
| 12        | 0.393822          |
| 13        | 0.390711          |
| 14        | 0.383791          |
| 15        | 0.378667          |
| 16        | 0.376847          |
| 17        | 0.337861          |
| 18        | 0.318567          |
| 19        | 0.2882            |
| 20        | 0.279671          |



1150

1151

1152

1153

1154

1155

1156

1157

1158 **Extended Data Table 4.** Nucleotide diversity ( $P_i$ ) within populations.

| <b>Population</b> | <b>n</b> | <b><math>P_i</math></b> |
|-------------------|----------|-------------------------|
| Chica Pool 1      | 5        | 0.0021                  |
| Chica Pool 2      | 14       | 0.0021                  |
| Río Choy          | 9        | 0.0028                  |
| Pachón            | 10       | 0.0008                  |
| Rascón            | 10       | 0.0013                  |
| Los Sabinos       | 3        | 0.0007                  |
| Tinaja            | 8        | 0.0008                  |

1159

1160

1161

1162

1163

1164

1165

1166

1167

1168

1169

1170

1171

1172

1173

1174

1175

1176

1177

1178 **Extended Data Table 5.** Absolute genetic divergence (Dxy) and relative genetic divergence (Fst)

1179 between populations. See Extended Data Table 4 for population sample sizes.

| <b>Population 1</b> | <b>Population 2</b> | <b>Dxy</b> | <b>Fst</b> |
|---------------------|---------------------|------------|------------|
| Chica Pool1         | Chica Pool2         | 0.0021     | 0.0000     |
| Chica Pool1         | Río Choy            | 0.0033     | 0.1440     |
| Chica Pool1         | Pachón              | 0.0030     | 0.3501     |
| Chica Pool1         | Rascón              | 0.0030     | 0.2592     |
| Chica Pool1         | Los Sabinos         | 0.0024     | 0.2029     |
| Chica Pool1         | Tinaja              | 0.0024     | 0.2364     |
| Chica Pool2         | Río Choy            | 0.0033     | 0.1651     |
| Chica Pool2         | Pachón              | 0.0030     | 0.3693     |
| Chica Pool2         | Rascón              | 0.0030     | 0.2923     |
| Chica Pool2         | Los Sabinos         | 0.0024     | 0.1154     |
| Chica Pool2         | Tinaja              | 0.0024     | 0.2477     |
| Río Choy            | Pachón              | 0.0035     | 0.3654     |
| Río Choy            | Rascón              | 0.0033     | 0.2507     |
| Río Choy            | Sabinos             | 0.0034     | 0.1900     |
| Río Choy            | Tinaja              | 0.0034     | 0.3555     |
| Pachón              | Rascón              | 0.0026     | 0.4572     |
| Pachón              | Los Sabinos         | 0.0020     | 0.2832     |
| Pachón              | Tinaja              | 0.0020     | 0.4430     |
| Rascón              | Los Sabinos         | 0.0023     | 0.2002     |

|             |        |        |        |
|-------------|--------|--------|--------|
| Rascón      | Tinaja | 0.0023 | 0.4003 |
| Los Sabinos | Tinaja | 0.0008 | 0.0164 |

1180

1181

1182

1183

1184

1185

1186

1187 **Extended Data Table 6.** Results of D statistic and f4 ratio tests for introgression. *A. aeneus*  
 1188 served as the outgroup. BBAA = derived alleles shared by P1 and P2. ABBA = derived alleles  
 1189 shared by P2 and P3. BABA = derived alleles shared by P1 and P3. Significant p-values (<0.05)  
 1190 indicate evidence of introgression between Choy, Chica, Rascón, and Tinaja.

1191

| P1       | P2     | P3       | D statistic | Z score | p-value  | f4 ratio | BBAA    | ABBA    | BABA    |
|----------|--------|----------|-------------|---------|----------|----------|---------|---------|---------|
| Río Choy | Chica  | Rascón   | 0.27893     | 21.4698 | 0        | 0.173087 | 8409.82 | 4100.59 | 2311.94 |
| Río Choy | Tinaja | Chica    | 0.14629     | 7.98383 | 7.09E-16 | 0.262394 | 2195.94 | 9381.5  | 6986.95 |
| Chica    | Tinaja | Rascón   | 0.409914    | 33.6245 | 0        | 0.230212 | 8116.3  | 3375    | 1412.52 |
| Rascón   | Tinaja | Río Choy | 0.2558      | 23.5379 | 0        | 0.11872  | 5652.15 | 3207.89 | 1901.03 |

1192

1193

1194

1195

1196

1197

1198

1199  
1200  
1201  
1202  
1203  
1204  
1205  
1206  
1207  
1208  
1209  
1210  
1211  
1212  
1213  
1214  
1215  
1216  
1217  
1218  
1219  
1220  
1221

**Extended Data Table 7.** Summary statistics for minor parent (i.e., Río Choy surface fish) ancestry tract lengths in base pair and estimated mean  $\pm$  SE number of generations since the onset of admixture ( $T_{\text{admix}}$ ) in Chica cave Pool 1 (n=5) and Pool 2 (n=14).

| <b>Population</b> | <b>Min</b> | <b>Max</b> | <b>Median</b> | <b>Mean</b> | <b>SE</b> | <b><math>T_{\text{admix}}</math></b> |
|-------------------|------------|------------|---------------|-------------|-----------|--------------------------------------|
| Pool 1            | 1,350      | 2,069,769  | 29,372        | 48,042      | 263       | 2315 $\pm$ 19                        |
| Pool 2            | 1,031      | 2,077,917  | 29,561        | 48,435      | 162       | 2294 $\pm$ 17                        |

1222  
1223  
1224  
1225  
1226  
1227  
1228  
1229  
1230  
1231  
1232

**Extended Data Table 8.** The mean minor parent (i.e. surface) tract lengths and mean major parent (i.e. cave) global ancestry proportions were used to infer the timing since admixture ( $T_{\text{admix}}$ ).

---

| <b>Pool</b> | <b>ID</b> | <b>MeanSurface<br/>TractLengthBP</b> | <b>MeanSurfaceTract<br/>LengthMorgans</b> | <b>MeanCaveGlobal<br/>Ancestry</b> | <b><math>T_{\text{admix}}</math></b> |
|-------------|-----------|--------------------------------------|-------------------------------------------|------------------------------------|--------------------------------------|
| 1           | Chica5_1  | 47096.4                              | 0.000546                                  | 0.770                              | 2377.275                             |
| 1           | Chica5_2  | 49508.8                              | 0.000574                                  | 0.759                              | 2294.262                             |
| 1           | Chica5_3  | 49475.3                              | 0.000574                                  | 0.750                              | 2324.321                             |
| 1           | Chica5_4  | 51214.4                              | 0.000594                                  | 0.744                              | 2261.418                             |
| 1           | Chica5_5  | 49574.2                              | 0.000575                                  | 0.751                              | 2315.212                             |
| 2           | Chica1_1  | 51893.7                              | 0.000602                                  | 0.739                              | 2246.508                             |
| 2           | Chica1_10 | 48084.2                              | 0.000558                                  | 0.755                              | 2374.725                             |
| 2           | Chica1_11 | 48674.3                              | 0.000565                                  | 0.762                              | 2323.384                             |
| 2           | Chica1_12 | 47755.7                              | 0.000554                                  | 0.755                              | 2389.959                             |
| 2           | Chica1_13 | 51812.5                              | 0.000601                                  | 0.768                              | 2166.720                             |
| 2           | Chica1_14 | 52055.8                              | 0.000604                                  | 0.755                              | 2193.243                             |
| 2           | Chica1_2  | 50207.8                              | 0.000582                                  | 0.761                              | 2257.289                             |
| 2           | Chica1_3  | 48756.4                              | 0.000566                                  | 0.754                              | 2343.562                             |
| 2           | Chica1_4  | 49882.2                              | 0.000579                                  | 0.755                              | 2289.383                             |
| 2           | Chica1_5  | 48534.3                              | 0.000563                                  | 0.767                              | 2315.360                             |
| 2           | Chica1_6  | 49014.7                              | 0.000569                                  | 0.773                              | 2276.677                             |
| 2           | Chica1_7  | 48674.4                              | 0.000565                                  | 0.755                              | 2345.607                             |
| 2           | Chica1_8  | 49867.9                              | 0.000578                                  | 0.741                              | 2333.061                             |
| 2           | Chica1_9  | 51125.9                              | 0.000593                                  | 0.745                              | 2262.986                             |

---

1233

1234

1235

1236

1237

1238

1239

1240

1241

1242 **Extended Data Table 9.** Absolute genetic divergence (Dxy) for each gene in comparisons  
1243 between Chica Pool 1 and Pool 2, Choy and Tinaja, Río Choy and Pachón, and Rascón and  
1244 Pachón.

1245 [https://docs.google.com/spreadsheets/d/1yottC4COSed0BGbgjfWui0e4RLgnYa0Hiq\\_YO\\_fCc3k](https://docs.google.com/spreadsheets/d/1yottC4COSed0BGbgjfWui0e4RLgnYa0Hiq_YO_fCc3k)

1246 [/edit#gid=2005687085](https://docs.google.com/spreadsheets/d/1yottC4COSed0BGbgjfWui0e4RLgnYa0Hiq_YO_fCc3k/edit#gid=2005687085)

1247

1248

1249

1250

1251

1252

1253

1254

1255

1256

1257

1258

1259

1260

1261

1262

1263

1264

1265

1266

1267

1268 **Extended Data Table 10.** Results of GO Analysis on genes with highest genetic divergence (top  
1269 5% Dxy) between Chica Pool 1 and Chica Pool 2.

1270 <https://drive.google.com/file/d/1RFayjPilvs8D-aXMa28abXI6Ghc5dx5t/view?usp=sharing>

1271

1272

1273

1274

1275

1276

1277

1278

1279

1280

1281

1282

1283

1284

1285

1286

1287

1288

1289

1290

1291

1292

1293

1294 **Extended Data Table 11.** Gene descriptions, phenotypes, and results of differential expression,  
1295 SIFT, VEP, and diploS/HIC selection analyses for candidate genes with ontologies related to  
1296 cave-adapted phenotypes and in the top 5% of Dxy values between Chica pools.

1297 <https://docs.google.com/spreadsheets/d/170S6uCleErV-->

1298 [V5uEzRDpUexXvwB5H\\_Y59\\_bD0\\_hTDk/edit?usp=sharing](https://docs.google.com/spreadsheets/d/170S6uCleErV--V5uEzRDpUexXvwB5H_Y59_bD0_hTDk/edit?usp=sharing)

1299

1300

1301

1302

1303

1304

1305

1306

1307

1308

1309

1310

1311



1312

1313

1314

1315

1316

1317

1318

1319

1320 **Extended Data Table 12.** Results of differential expression analysis across all time points.

1321 [https://docs.google.com/spreadsheets/d/1Xmtlj965TAzRtgz7iQBEDCto132VceVIFK2\\_er7D3TQ/](https://docs.google.com/spreadsheets/d/1Xmtlj965TAzRtgz7iQBEDCto132VceVIFK2_er7D3TQ/)

1322 [edit?usp=sharing](#)

1323

1324

1325

1326

1327

1328

1329

1330

1331

1332

1333

1334

1335

1336

1337

1338  
1339  
1340  
1341  
1342  
1343  
1344  
1345  
1346  
1347  
1348  
1349  
1350

**Extended Data Table 13.** Summary statistics for differential expression analysis in 30 dpf fry from lab-raised cavefish (Tinaja cave) versus surface fish (Río Choy) stock across six timepoints. Summaries are shown for the entire dataset of all genes and a subset of genes within the top 5% of Dxy values between Chica pools.

| <b>Summary Statistics</b>       | <b>0hr</b> | <b>4hr</b> | <b>8hr</b> | <b>12hr</b> | <b>16hr</b> | <b>20hr</b> | <b>Mean</b> | <b>SE</b> |
|---------------------------------|------------|------------|------------|-------------|-------------|-------------|-------------|-----------|
| <b>N Choy</b>                   | 6          | 4          | 6          | 5           | 6           | 5           | 5.33        | 0.33      |
| <b>N Tinaja</b>                 | 6          | 5          | 6          | 6           | 6           | 6           | 5.83        | 0.17      |
| <b>Total Genes</b>              | 27420      | 27420      | 27420      | 27420       | 27420       | 27420       | -           | -         |
| <b>Genes Retained</b>           | 18597      | 16252      | 18364      | 17747       | 17240       | 17501       | 17617       | 344       |
| <b>Genes Padj&lt;0.05</b>       | 3691       | 2913       | 7404       | 8358        | 6969        | 3932        | 5545        | 937       |
| <b>Prop. Genes Padj&lt;0.05</b> | 0.20       | 0.18       | 0.40       | 0.47        | 0.40        | 0.23        | 0.31        | 0.05      |
| <b>Chica Top 5% Dxy Genes</b>   | 706        | 706        | 706        | 706         | 706         | 706         | -           | -         |
| <b>Genes Retained</b>           | 575        | 522        | 573        | 562         | 550         | 556         | 556         | 8         |
| <b>Genes Padj&lt;0.05</b>       | 133        | 103        | 239        | 277         | 225         | 142         | 187         | 28        |
| <b>Prop. Genes Padj&lt;0.05</b> | 0.23       | 0.20       | 0.42       | 0.49        | 0.41        | 0.26        | 0.33        | 0.05      |

1351  
1352

1353

1354

1355

1356

1357

1358

1359

1360

1361

1362

1363

1364

1365

1366

1367

1368

1369

1370

1371

1372

1373

1374

1375 **Extended Data Figures**

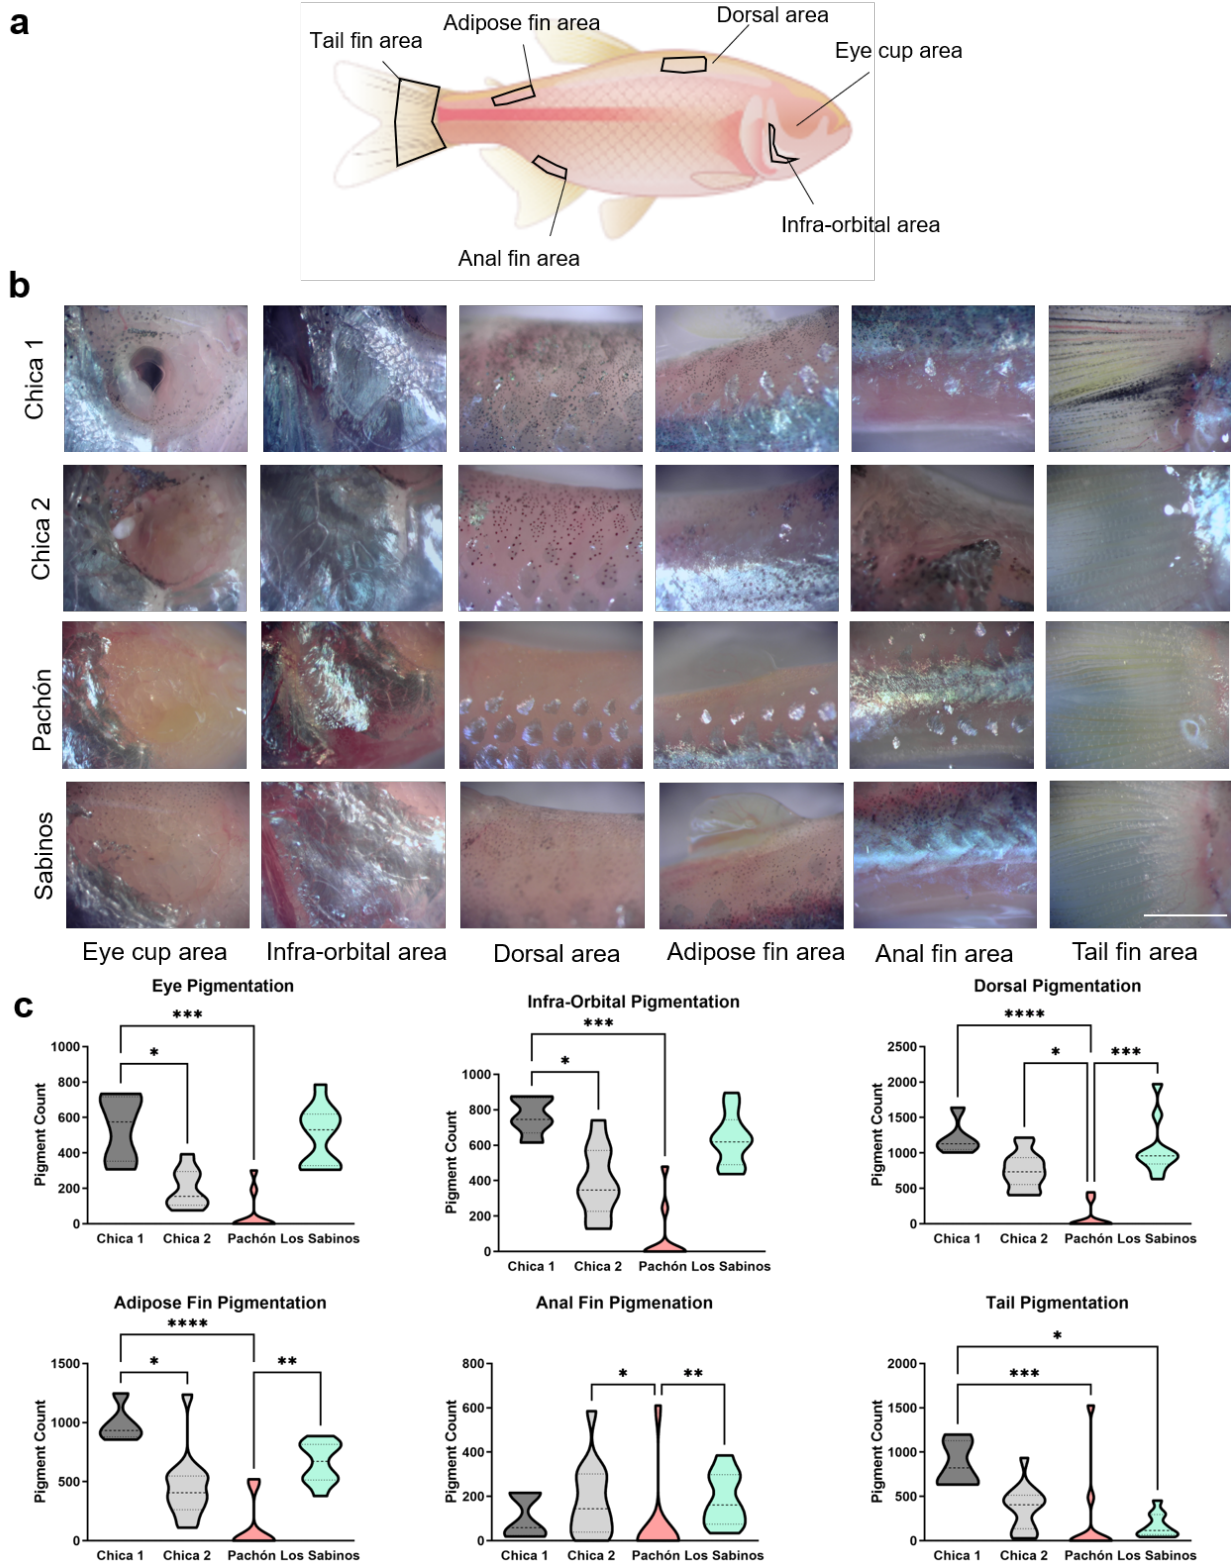

1376

1377 **Extended Data Figure 1. Eye and pigment morphology variations among cave populations. (A)**

1378 **Diagram of areas used for pigmentation quantifications. (B) Brightfield images of fish bodies**

1379 showing pigmentation across multiple cave populations. (C) Pigment count quantifications by  
1380 area. Eye cup: Kruskal-Wallis test,  $P < 0.001$ , KW statistic = 24.28. Chica 1 vs Chica 2,  $p < 0.05$ ;  
1381 Chica 1 vs Pachon,  $p < 0.001$ . Infra-Orbital: Kruskal-Wallis test,  $P < 0.001$ , KW statistic = 22.70.  
1382 Chica 1 vs Chica 2,  $p < 0.05$ ; Chica 1 vs Pachon,  $p < 0.001$ . Dorsal area: Kruskal-Wallis test,  $P <$   
1383  $0.001$ , KW statistic = 25.66. Chica 1 vs Pachon,  $p < 0.001$ ; Chica 2 vs Pachon,  $p < 0.05$ ; Pachon  
1384 vs Los Sabinos,  $p < 0.001$ . Adipose area: Kruskal-Wallis test,  $P < 0.001$ , KW statistic = 23.65. Chica  
1385 1 vs Chica 2,  $p < 0.05$ ; Chica 1 vs Pachon,  $p < 0.001$ , Pachon vs Los Sabinos,  $p < 0.01$ . Anal fin:  
1386 Kruskal-Wallis test,  $P < 0.01$ , KW statistic = 12.44. Chica 2 vs Pachon,  $p < 0.05$ , Pachon vs Los  
1387 Sabinos,  $p < 0.01$ . Tail area: Kruskal-Wallis test,  $P < 0.001$ , KW statistic = 16.87. Chica 1 vs Pachon,  
1388  $p < 0.001$ , Chica 1 vs Los Sabinos,  $p < 0.05$ .

1389

1390

1391

1392

1393

1394

1395

1396

1397

1398

1399

1400

1401

1402

1403

1404

1405

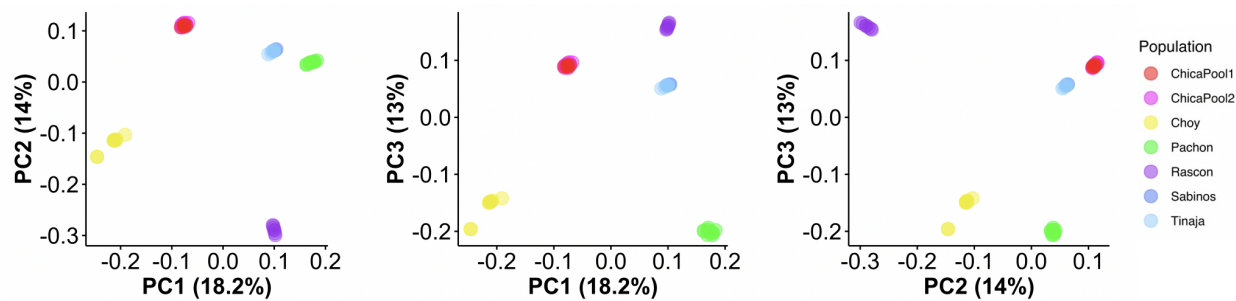

1406

1407 **Extended Data Figure 2.** Biplots of scores for the first three PCs from the PCA on SNPs from  
1408 cave (Chica, Pachón, Tinaja, Los Sabinos) and surface (Río Choy and Rascón) populations. Note  
1409 that individuals from Chica Pool 1 and Pool 2 overlap and individuals from Tinaja and Los Sabinos  
1410 overlap.

1411

1412

1413

1414

1415

1416

1417

1418

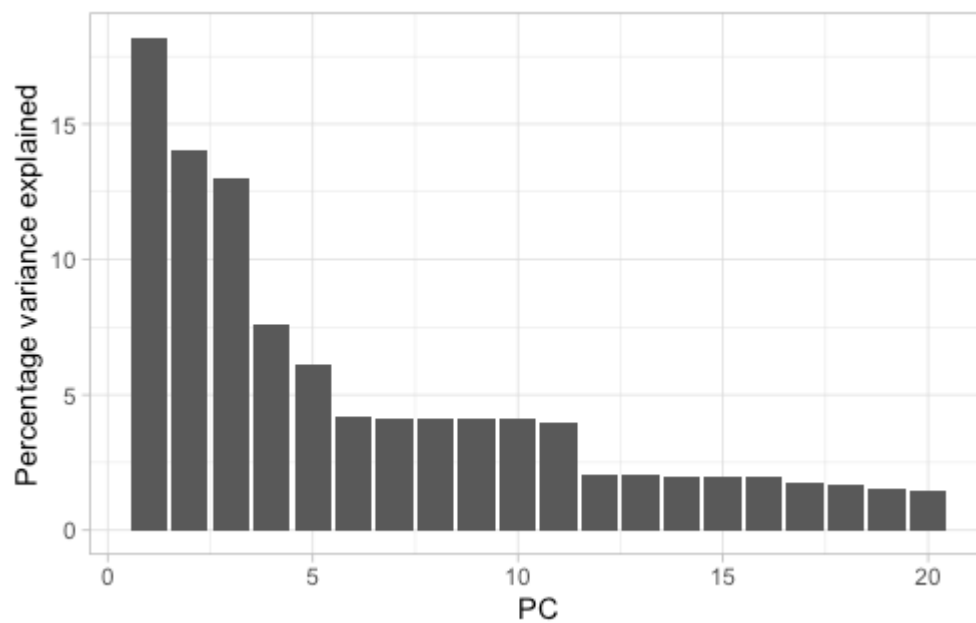

1419

1420 **Extended Data Figure 3.** Percentage of variance explained for PCs 1-20 from PCA containing

1421 all six *Astyanax* populations (i.e., Chica, Río Choy, Los Sabinos, Pachón, Rascón, and Tinaja).

1422 .

1423

1424

1425

1426

1427

1428

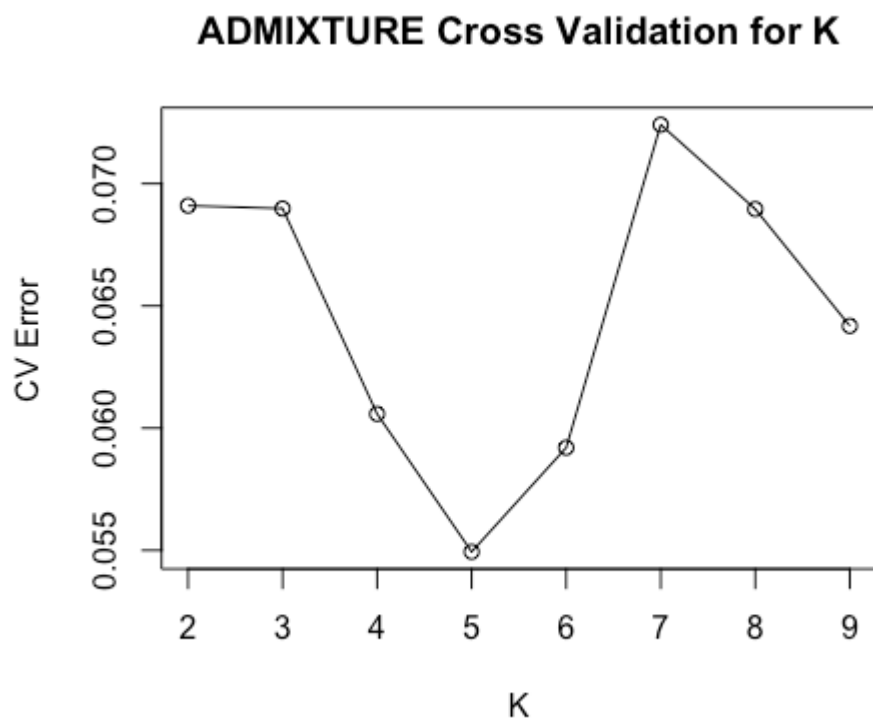

1429

1430 **Extended Data Figure 4.** Cross validation (CV) error calculated in ADMIXTURE for values of K  
1431 ranging from 2-9. A value of 5 is indicated to be the best estimate for the true number of  
1432 populations clusters because it exhibits the lowest CV error.

1433

1434

1435

1436

1437

1438

1439



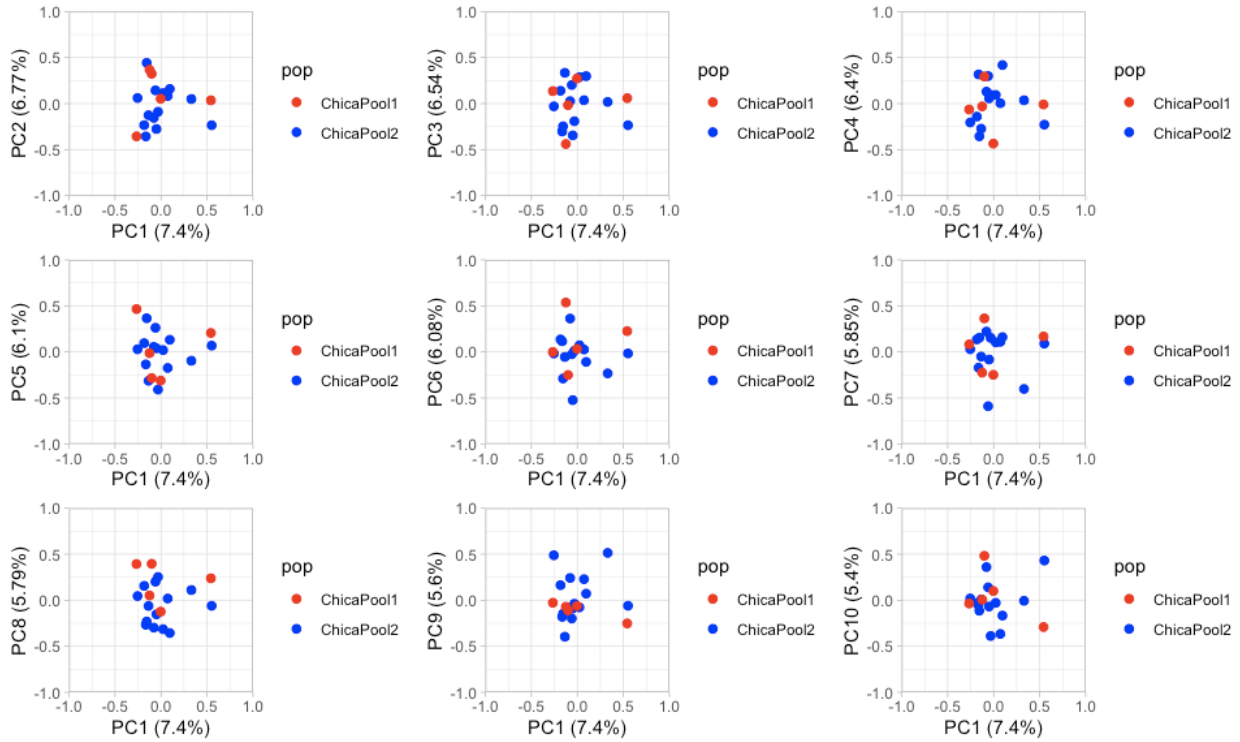

1440

1441 **Extended Data Figure 5.** Biplots of PCs 1-10 for PCA including only Chica Pools 1 and 2. Note

1442 overlap of individuals from both pools.

1443

1444

1445

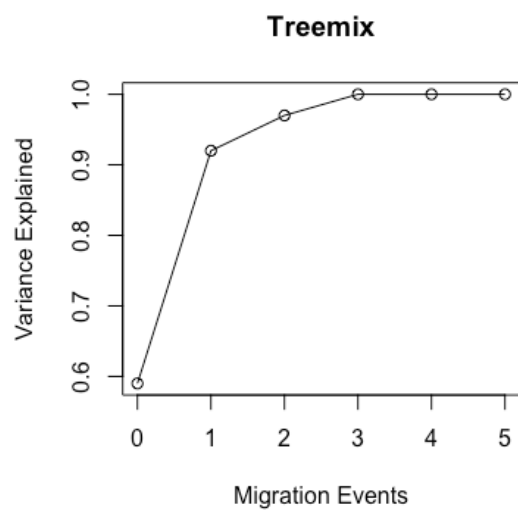

1446

1447 **Extended Data Figure 6.** Variance explained for 0-5 migration events in Treemix. Variance  
1448 explained plateaus at 3 migration events.

1449

1450

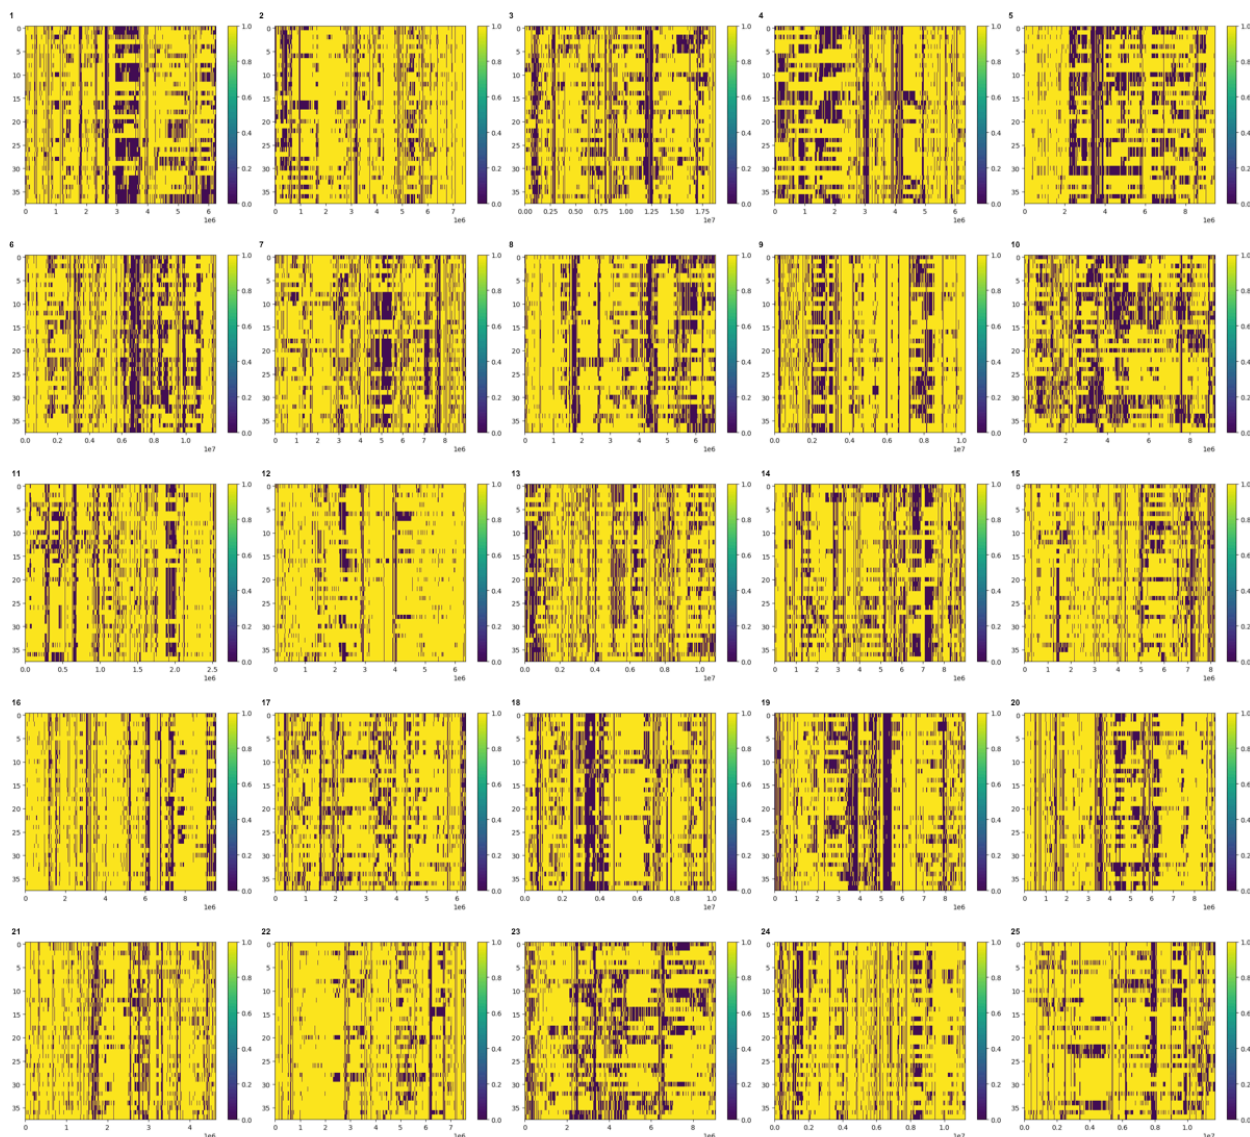

1451

1452 **Extended Data Figure 7.** Local ancestry tracts in Chica samples inferred using a Hidden Markov  
1453 Model approach along each of the 25 chromosomes. Yellow represents cave ancestry and purple  
1454 represents surface ancestry. The y axis shows haplotypes 1 - 38, with haplotypes 0 - 27  
1455 corresponding to Chica Pool 2 (n = 14 diploid individuals), and haplotypes 28 - 38 corresponding  
1456 to Chica Pool 1 (n = 5 diploid individuals). The x axis shows bp position along each chromosome.

1457

1458

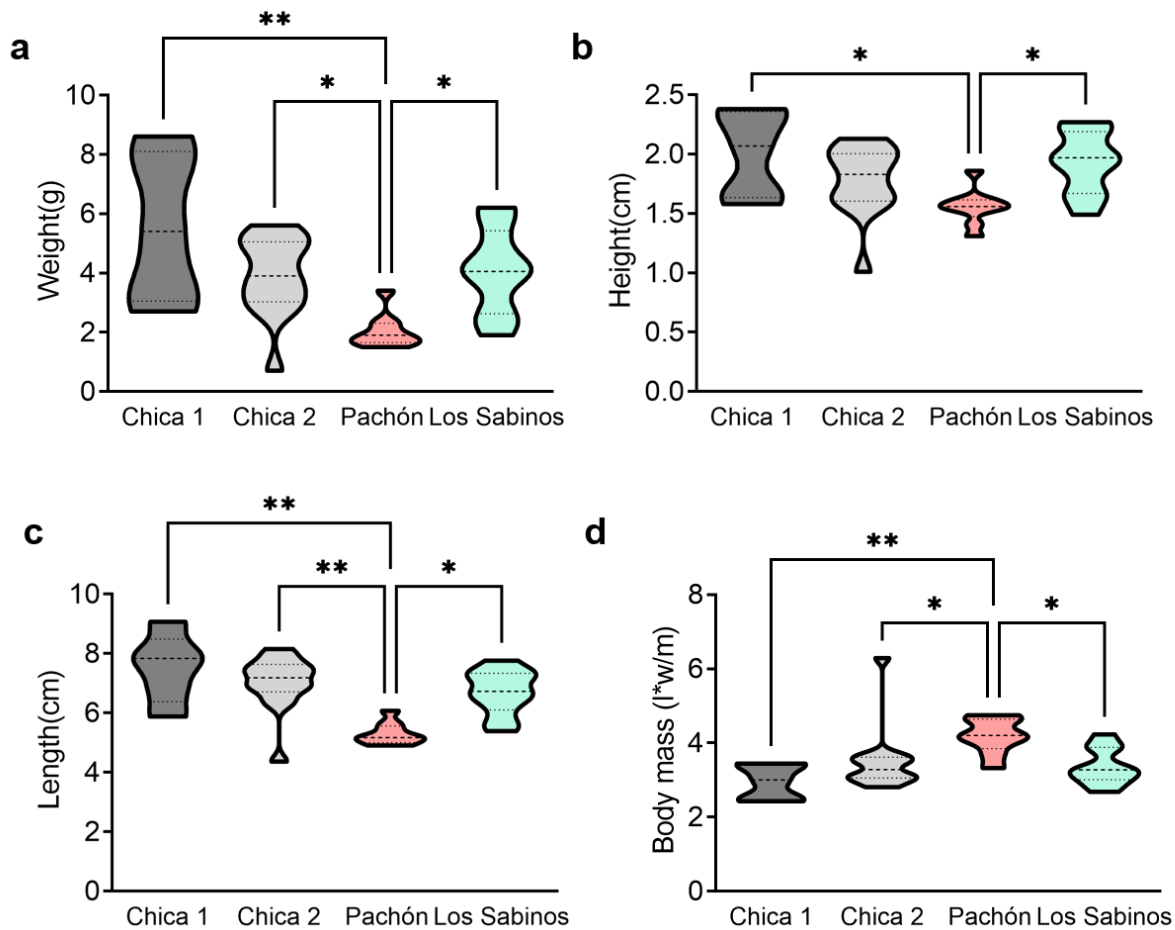

1459

1460 **Extended Data Figure 8.** Physical morphology in cave populations of *A. mexicanus*. A. Pachón

1461 cavefish weigh significantly less than Chica pool 1 and 2 and Los Sabinos Kruskal-Wallis test,  $P$

1462  $< 0.01$ , KW statistic = 15.19. Chica 1 vs Pachon,  $p < 0.01$ ; Chica 2 vs Pachon,  $p < 0.05$ , Pachon vs

1463 Los Sabinos,  $p < 0.05$ . B. Body height from dorsal fin to stomach is smaller in Pachón cavefish

1464 compared to Chica Pool 1 and 2 as well as Los Sabinos. Kruskal-Wallis test,  $P < 0.01$ , KW

1465 statistic = 11.90. Chica 1 vs Pachon,  $p < 0.05$ ; Pachon vs Los Sabinos,  $p < 0.05$  C. Body length

1466 measured from mouth to tail is significantly smaller in Pachón cavefish compared to all other

1467 cave populations. Kruskal-Wallis test,  $P < 0.001$ , KW statistic = 17.84. Chica 1 vs Pachon,  $p < 0.01$ ;

1468 Chica 2 vs Pachon,  $p < 0.01$ , Pachon vs Los Sabinos,  $p < 0.05$ . D. Body mass is significantly

1469 larger in Pachón cavefish compared to other populations Kruskal-Wallis test,  $P < 0.01$ , KW

1470 statistic = 14.41. Chica 1 vs Pachon,  $p < 0.01$ ; Chica 2 vs Pachon,  $p < 0.05$ , Pachon vs Los

1471 Sabinos,  $p < 0.05$ .

1472
